# Supplementary material
Source: Research Square preprint supplement (doi:10.21203/rs.3.rs-9940836/v1)
Supplement: Supplementary file 1 [file 1bb59f47d2805321b4f25b88.pdf]

## Supplementary Materials Tables:

- 1- Statistics of Wilcoxon signed rank tests, comparing cross-validated model fits to zero for the Within ROI model.
- 2- Statistics of Wilcoxon signed rank tests, comparing model performance to zero for the Within ROI model
- 3- Selection of source ROIs for the Between ROI model
- 4- Comparison of source ROIs for the Between ROI model
- 5- Statistics of Wilcoxon signed rank tests, comparing cross-validated model fits to zero for the Between ROI model.
- 6- Statistics of Wilcoxon signed rank tests, comparing model performance to zero for the Between ROI model
- 7- Statistics of Wilcoxon signed rank tests, comparing cross-validated model fits between the Within ROI and Between ROI models
- 8- Statistics of Wilcoxon signed rank tests, comparing model performance between the Within ROI and Between ROI models
- 9- Bayesian analysis for a directed distribution of the direction of maximal change in preferred representational space positions across the cortical surface for the Within ROI model
- 10- Bayesian analysis for a directed distribution of the direction of maximal change in preferred representational space positions across the cortical surface for the Between ROI model
- 11- Descriptive statistics for correlations between cortical surface distances and representational space distances between vertices in the Within ROI model
- 12- Descriptive statistics for correlations between cortical surface distances and representational space distances between vertices in the Within ROI model
- 13- Descriptive statistics for correlations between the preferred representational space position  $x_0$  and visual field position eccentricity in the Within ROI model
- 14- Descriptive statistics for correlations between the preferred representational space position  $y_0$  and visual field position eccentricity in the Within ROI model
- 15- Descriptive statistics for correlations between the preferred representational space position  $x_0$  and visual field position eccentricity in the Between ROI model
- 16- Descriptive statistics for correlations between the preferred representational space position  $y_0$  and visual field position eccentricity in the Between ROI model

| Variance explained Within ROI | n  | p      | W   | z      |
|-------------------------------|----|--------|-----|--------|
| <b>V1</b>                     | 16 | 0.034  | 117 | 2.534  |
| <b>V2</b>                     | 16 | 0.068  | 109 | 2.120  |
| <b>V3</b>                     | 16 | 0.469  | 86  | 0.931  |
| <b>hV4</b>                    | 16 | -0.068 | 27  | -2.120 |
| <b>VO-1</b>                   | 16 | 0.642  | 80  | 0.621  |
| <b>VO-2</b>                   | 16 | -0.118 | 34  | -1.758 |
| <b>PHC-1</b>                  | 16 | -0.877 | 65  | -0.155 |
| <b>PHC-2</b>                  | 16 | 0.010  | 129 | 3.154  |
| <b>LO-1</b>                   | 16 | -0.741 | 60  | -0.414 |
| <b>LO-2</b>                   | 16 | 0.018  | 123 | 2.844  |
| <b>TO-1</b>                   | 16 | 0.005  | 136 | 3.516  |
| <b>TO-2</b>                   | 16 | 0.096  | 105 | 1.913  |

**Table S1: Statistics of Wilcoxon signed rank tests, comparing cross-validated model fits to zero for the Within ROI model.** *n* is the number of examples of the visual field map in different hemisphere. *p* is the probability of that the median variance explained is above zero (a negative *p* indicates a negative median). The *W* and *z* are Wilcoxon test statistic and z-score.

| Model Performance Within ROI | n  | p      | W   | z      |
|------------------------------|----|--------|-----|--------|
| <b>V1</b>                    | 16 | 0.526  | 83  | 0.776  |
| <b>V2</b>                    | 16 | 0.660  | 78  | 0.517  |
| <b>V3</b>                    | 16 | 0.717  | 61  | -0.362 |
| <b>hV4</b>                   | 16 | -0.018 | 11  | -2.947 |
| <b>VO-1</b>                  | 16 | -0.325 | 41  | -1.396 |
| <b>VO-2</b>                  | 16 | -0.029 | 18  | -2.585 |
| <b>PHC-1</b>                 | 16 | -0.526 | 53  | -0.776 |
| <b>PHC-2</b>                 | 16 | 0.018  | 123 | 2.844  |
| <b>LO-1</b>                  | 16 | -0.119 | 30  | -1.965 |
| <b>LO-2</b>                  | 16 | 0.336  | 93  | 1.293  |
| <b>TO-1</b>                  | 16 | 0.005  | 136 | 3.516  |
| <b>TO-2</b>                  | 16 | 0.489  | 87  | 0.982  |

**Table S2: Statistics of Wilcoxon signed rank tests, comparing model performance to zero for the Within ROI model.** *n* is the number of examples of the visual field map in different hemisphere. *p* is the probability of that the median model performance is above zero (a negative *p* indicates a negative median). The *W* and *z* are Wilcoxon test statistic and z-score.

|       | V1         | V2         | V3         | hV4        | VO-1       | VO-2       | PHC-1      | PHC-2      | LO-1       | LO-2       | TO-1       | TO-2       | Best fitting |
|-------|------------|------------|------------|------------|------------|------------|------------|------------|------------|------------|------------|------------|--------------|
| V1    | 0.02096302 | 0.02380351 | 0.01534293 | 0.01075723 | 0.00938571 | 0.00828443 | 0.00397221 | 0.0038252  | 0.00371015 | 0.00129045 | 0.00230164 | -0.0050482 | V2           |
| V2    | 0.01616229 |            | 0.021402   | 0.01141011 | 0.01186061 | 0.00830601 | 0.00541868 | 0.00391121 | 0.00374487 | 0.00180955 | 0.0024272  | -0.0037586 | V3           |
| V3    | 0.00817946 | 0.00846265 |            | 0.00599891 | 0.00811145 | 0.00439536 | 0.00610156 | 0.0044175  | 0.00389403 | 0.00261584 | 0.00342036 | -0.0068933 | V2           |
| hV4   | 0.00226186 | 0.00054236 | 0.00864067 |            | 0.00596621 | -0.0013235 | 0.00851346 | 0.00915769 | 0.00504629 | 0.00557387 | 0.00755736 | -0.0052612 | PHC-2        |
| VO-1  | -0.0001609 | -0.0007815 | 0.00088951 | -0.0012938 |            | -0.0002185 | 0.00361952 | 0.02841453 | 0.02001445 | 0.0213826  | 0.0246819  | -0.0008386 | PHC-2        |
| VO-2  | -0.002742  | -0.0031195 | -0.0004403 | -0.0048413 | 0.00121568 |            | 0.00168551 | 0.02952985 | 0.03369756 | 0.03248371 | 0.03262154 | 0.00455525 | LO-1         |
| PHC-1 | -0.0058038 | -0.0051733 | -0.003037  | -0.0064892 | -0.0009646 | -0.0028957 |            | 0.03330669 | 0.03293811 | 0.042445   | 0.04280148 | 0.01100249 | TO-1         |
| PHC-2 | -0.0043294 | -0.0032371 | -0.0017349 | -0.0050199 | 0.00146452 | -0.0009637 | 0.00523882 |            | 0.04172214 | 0.05395071 | 0.05855818 | 0.01502824 | TO-1         |
| LO-1  | -0.0060218 | -0.0066919 | -0.0038138 | -0.0042608 | -0.0070112 | -0.0099563 | -0.0022001 | 0.00479525 |            | 0.00842051 | 0.00955717 | -0.0218651 | TO-1         |
| LO-2  | -0.0077872 | -0.0064784 | -0.0052931 | -0.004875  | -0.0070551 | -0.0052026 | -0.0047081 | 0.01404064 | 0.01453424 |            | 0.01989671 | -0.0071557 | TO-1         |
| TO-1  | -0.0036417 | -0.0011513 | -0.0031735 | -0.0017041 | -0.0019438 | -0.0001904 | 0.00092492 | 0.04240336 | 0.04497646 | 0.0479896  |            | 0.01367519 | LO-2         |
| TO-2  | -0.0030672 | -0.0020172 | -0.0024079 | -0.0025654 | -0.0003374 | -0.0023619 | 0.00133964 | 0.03771458 | 0.04183314 | 0.04454944 | 0.05376732 |            | TO-1         |

**Table S3: Selection of source ROIs for the Between ROI model.** Average *CVFE* in each target ROI (rows) by representational tuning functions fit in the MDS space of each source ROI (rows) excluding itself. We did not exclude V1's as a source ROI for itself since V1 takes input from the retinogeniculate pathway. The rightmost column shows which source ROI led to the highest average VE in each target ROI, which were the ones that we ultimately selected for creating the between ROI model.

|       | V1         | V2         | V3         | hV4        | VO-1       | VO-2       | PHC-1      | PHC-2      | LO-1       | LO-2       | TO-1       | TO-2       | Best fitting |
|-------|------------|------------|------------|------------|------------|------------|------------|------------|------------|------------|------------|------------|--------------|
| V1    | 0.79598722 | 1          | 0.10894087 | 0.00093509 | 0.02289478 | 0.00112338 | 0.00836065 | 0.00972552 | 0.00093509 | 0.00160919 | 0.01508582 | 0.00077641 | V2           |
| V2    | 0.67911569 | 0.00320459 | 1          | 0.00191877 | 0.01508582 | 0.00112338 | 0.00053124 | 0.00191877 | 0.00077641 | 0.00093509 | 0.00613337 | 0.00043778 | V3           |
| V3    | 0.37937467 | 1          | 0.56949428 | 0.02987314 | 0.71738089 | 0.03860705 | 0.10894087 | 0.17881003 | 0.01997088 | 0.05571932 | 0.64166013 | 0.00077641 | V2           |
| hV4   | 0.14766026 | 0.08793561 | 0.40804421 | 0.00378325 | 0.71738089 | 0.00160919 | 0.60509495 | 1          | 0.01508582 | 0.0979893  | 0.87672174 | 0.01128558 | PHC-2        |
| VO-1  | 0.01997088 | 0.00613337 | 0.01997088 | 0.00523391 | 0.01737836 | 0.00228219 | 0.00270771 | 1          | 0.01128558 | 0.07032574 | 0.60509495 | 0.00523391 | PHC-2        |
| VO-2  | 0.01128558 | 0.00972552 | 0.00972552 | 0.00228219 | 0.01128558 | 0.00320459 | 0.00378325 | 0.87672174 | 1          | 0.79598722 | 0.43796658 | 0.00836065 | LO-1         |
| PHC-1 | 0.00053124 | 0.00053124 | 0.00053124 | 0.00043778 | 0.00053124 | 0.00043778 | 0.00043778 | 0.00523391 | 0.00270771 | 0.16267332 | 1          | 0.00043778 | TO-1         |
| PHC-2 | 0.00053124 | 0.00053124 | 0.00053124 | 0.00053124 | 0.00053124 | 0.00053124 | 0.00043778 | 0.00064304 | 0.00077641 | 0.02987314 | 1          | 0.00053124 | TO-1         |
| LO-1  | 0.00093509 | 0.00053124 | 0.00077641 | 0.0013462  | 0.00077641 | 0.00191877 | 0.00160919 | 0.03860705 | 0.00077641 | 0.02987314 | 1          | 0.00093509 | TO-1         |
| LO-2  | 0.00043778 | 0.00043778 | 0.00043778 | 0.00043778 | 0.00043778 | 0.00043778 | 0.00043778 | 0.16267332 | 0.02987314 | 0.08793561 | 1          | 0.00043778 | TO-1         |
| TO-1  | 0.00043778 | 0.00043778 | 0.00043778 | 0.00043778 | 0.00043778 | 0.00043778 | 0.00043778 | 0.13372989 | 0.83613866 | 1          | 0.08793561 | 0.00093509 | LO-2         |
| TO-2  | 0.00043778 | 0.00043778 | 0.00043778 | 0.00043778 | 0.00043778 | 0.00043778 | 0.00043778 | 0.00270771 | 0.0979893  | 0.10894087 | 1          | 0.00445535 | TO-1         |

**Figure S4: Comparison of source ROIs for the Between ROI model.** *p*-values of the Wilcoxon test that compares, for each target ROI, the distributions of variance explained for each source ROI against the distributions of variance explained for the best fitting source ROI, over all subjects and both hemispheres. For example, the top left cell compared the distribution of average variance explained across both hemispheres and all subjects of target voxels in V1 fitted using V1's MDS space as the source against when using the best source ROI (V2) as the source. In many cases, like this example, the best source ROI does not explain significantly more variance than other nearby ROIs.

| Variance explained Between ROI | n  | p     | W   | z     |
|--------------------------------|----|-------|-----|-------|
| <b>V1</b>                      | 16 | 0.018 | 115 | 2.430 |
| <b>V2</b>                      | 16 | 0.006 | 124 | 2.896 |
| <b>V3</b>                      | 16 | 0.049 | 106 | 1.965 |
| <b>hV4</b>                     | 16 | 0.005 | 126 | 2.999 |
| <b>VO-1</b>                    | 16 | 0.011 | 119 | 2.637 |
| <b>VO-2</b>                    | 16 | 0.002 | 133 | 3.361 |
| <b>PHC-1</b>                   | 16 | 0.002 | 135 | 3.464 |
| <b>PHC-2</b>                   | 16 | 0.002 | 135 | 3.464 |
| <b>LO-1</b>                    | 16 | 0.049 | 106 | 1.965 |
| <b>LO-2</b>                    | 16 | 0.005 | 125 | 2.947 |
| <b>TO-1</b>                    | 16 | 0.002 | 136 | 3.516 |
| <b>TO-2</b>                    | 16 | 0.002 | 136 | 3.516 |

**Table S5: Statistics of Wilcoxon signed rank tests, comparing cross-validated model fits to zero for the Between ROI model.** n is the number of examples of the visual field map in different hemisphere. p is the probability of that the median variance explained is above zero (a negative p indicates a negative median). The W and z are Wilcoxon test statistic and z-score.

| Model Performance Between ROI | n  | p      | W   | z      |
|-------------------------------|----|--------|-----|--------|
| <b>V1</b>                     | 16 | 0.445  | 84  | 0.827  |
| <b>V2</b>                     | 16 | 0.370  | 90  | 1.138  |
| <b>V3</b>                     | 16 | -0.391 | 49  | -0.982 |
| <b>hV4</b>                    | 16 | 0.370  | 89  | 1.086  |
| <b>VO-1</b>                   | 16 | 0.125  | 104 | 1.862  |
| <b>VO-2</b>                   | 16 | 0.002  | 133 | 3.361  |
| <b>PHC-1</b>                  | 16 | 0.002  | 133 | 3.361  |
| <b>PHC-2</b>                  | 16 | 0.002  | 133 | 3.361  |
| <b>LO-1</b>                   | 16 | -0.836 | 64  | -0.207 |
| <b>LO-2</b>                   | 16 | 0.135  | 102 | 1.758  |
| <b>TO-1</b>                   | 16 | 0.002  | 135 | 3.464  |
| <b>TO-2</b>                   | 16 | 0.002  | 136 | 3.516  |

**Table S6: Statistics of Wilcoxon signed rank tests, comparing model performance to zero for the Between ROI model.** n is the number of examples of the visual field map in different hemisphere. p is the probability of that the median model performance is above zero (a negative p indicates a negative median). The W and z are Wilcoxon test statistic and z-score.

| Variance explained difference Within ROI - Between ROI | n  | p      | W   | z      |
|--------------------------------------------------------|----|--------|-----|--------|
| <b>V1</b>                                              | 16 | -0.796 | 73  | 0.259  |
| <b>V2</b>                                              | 16 | 0.008  | 125 | 2.947  |
| <b>V3</b>                                              | 16 | -0.026 | 21  | -2.430 |
| <b>hV4</b>                                             | 16 | 0.384  | 86  | 0.931  |
| <b>VO-1</b>                                            | 16 | 0.026  | 114 | 2.379  |
| <b>VO-2</b>                                            | 16 | 0.008  | 125 | 2.947  |
| <b>PHC-1</b>                                           | 16 | 0.008  | 128 | 3.103  |
| <b>PHC-2</b>                                           | 16 | 0.008  | 134 | 3.413  |
| <b>LO-1</b>                                            | 16 | -0.094 | 33  | -1.810 |
| <b>LO-2</b>                                            | 16 | -0.008 | 9   | -3.051 |
| <b>TO-1</b>                                            | 16 | -0.106 | 35  | -1.706 |
| <b>TO-2</b>                                            | 16 | 0.009  | 123 | 2.844  |

**Table S7: Statistics of Wilcoxon signed rank tests, comparing cross-validated model fits between the Within ROI and Between ROI models.** *n* is the number of examples of the visual field map in different hemisphere. *p* is the probability of that the median variance explained is greater for the Between ROI model (a negative *p* indicates the median variance explained is greater for the Within ROI model). The *W* and *z* are Wilcoxon test statistic and z-score.

| Model Performance Within ROI - Between ROI | n  | p      | W   | z      |
|--------------------------------------------|----|--------|-----|--------|
| <b>V1</b>                                  | 16 | 0.512  | 82  | 0.724  |
| <b>V2</b>                                  | 16 | 0.034  | 113 | 2.327  |
| <b>V3</b>                                  | 16 | -0.039 | 25  | -2.223 |
| <b>hV4</b>                                 | 16 | 0.535  | 80  | 0.621  |
| <b>VO-1</b>                                | 16 | 0.034  | 114 | 2.379  |
| <b>VO-2</b>                                | 16 | 0.020  | 119 | 2.637  |
| <b>PHC-1</b>                               | 16 | 0.018  | 121 | 2.741  |
| <b>PHC-2</b>                               | 16 | 0.014  | 129 | 3.154  |
| <b>LO-1</b>                                | 16 | -0.490 | 52  | -0.827 |
| <b>LO-2</b>                                | 16 | -0.014 | 9   | -3.051 |
| <b>TO-1</b>                                | 16 | -0.340 | 46  | -1.138 |
| <b>TO-2</b>                                | 16 | 0.018  | 122 | 2.792  |

**Table S8: Statistics of Wilcoxon signed rank tests, comparing model performance between the Within ROI and Between ROI models.** *n* is the number of examples of the visual field map in different hemisphere. *p* is the probability of that the median model performance is greater for the Between ROI model (a negative *p* indicates the median model performance is greater for the Within ROI model). The *W* and *z* are Wilcoxon test statistic and z-score.

| Rois  | pH0        | pHa        | BF <sub>10</sub> |
|-------|------------|------------|------------------|
| V1    | 0.001358   | 0.998642   | 735.377194       |
| V2v   | 0.00194754 | 0.99805246 | 512.467323       |
| V2d   | 0.00105226 | 0.99894774 | 949.33532        |
| V3v   | 0.00590785 | 0.99409215 | 168.266187       |
| V3d   | 0.00552872 | 0.99447128 | 179.873764       |
| hV4   | 0.00132708 | 0.99867292 | 752.531716       |
| VO-1  | 0.00255903 | 0.99744097 | 389.773807       |
| VO-2  | 0.03236001 | 0.96763999 | 29.9023417       |
| PHC-1 | 0.01531733 | 0.98468267 | 64.2855483       |
| PHC-2 | 0.04394177 | 0.95605823 | 21.7573893       |
| LO-1  | 0.00296224 | 0.99703776 | 336.582362       |
| LO-2  | 0.001008   | 0.998992   | 991.066925       |
| TO-1  | 0.00077644 | 0.99922356 | 1286.92697       |
| TO-2  | 0.01190515 | 0.98809485 | 82.9972623       |

**Table S9: Bayesian analysis for a directed distribution of the direction of maximal change in preferred representational space positions across the cortical surface for the Within ROI model.** pH0 is the posterior probability of a uniform circular distribution of the direction of maximal change, while pHa is the posterior probability of a von Mises (circular Gaussian distribution). In each ROI, there is strong evidence of a von Mises distribution

| rois  | pH0        | pHa        | BF <sub>10</sub> |
|-------|------------|------------|------------------|
| V1    | 0.00162743 | 0.99837257 | 613.465824       |
| V2v   | 0.00482722 | 0.99517278 | 206.158476       |
| V2d   | 0.00203255 | 0.99796745 | 490.992587       |
| V3v   | 0.00127232 | 0.99872768 | 784.96605        |
| V3d   | 0.00114913 | 0.99885087 | 869.223725       |
| hV4   | 0.00046446 | 0.99953554 | 2152.03892       |
| VO-1  | 0.00148125 | 0.99851875 | 674.106766       |
| VO-2  | 0.00667638 | 0.99332362 | 148.781765       |
| PHC-1 | 0.00226974 | 0.99773026 | 439.579713       |
| PHC-2 | 0.00656338 | 0.99343662 | 151.360535       |
| LO-1  | 0.00032333 | 0.99967667 | 3091.842         |
| LO-2  | 0.00044379 | 0.99955621 | 2252.30522       |
| TO-1  | 0.00204617 | 0.99795383 | 487.716968       |
| TO-2  | 0.00102237 | 0.99897763 | 977.116235       |

**Table S10: Bayesian analysis for a directed distribution of the direction of maximal change in preferred representational space positions across the cortical surface for the Between ROI model.** pH0 is the posterior probability of a uniform circular distribution of the direction of maximal change, while pHa is the posterior probability of a von Mises (circular Gaussian distribution). In each ROI, there is strong evidence of a von Mises distribution

| P          | Hemi  | V1        | V2d       | V2v        | V3d        | V3v        | hV4        | VO-1       | VO-2       | PHC-1      | PHC-2      | LO-1       | LO-2       | TO-1       | TO-2       | p<0.05 | %         |
|------------|-------|-----------|-----------|------------|------------|------------|------------|------------|------------|------------|------------|------------|------------|------------|------------|--------|-----------|
| P1         | Left  | 6.68E-219 | 0         | 0          | 0          | 0          | 3.241E-142 | 1.143E-170 | 0.00055164 | 9.1144E-26 | 1.0124E-08 | 0.16073633 | 3.2791E-33 | 1.2365E-92 | 2.5939E-16 | 13     | 93        |
| P1         | Right | 0         | 0         | 7.932E-227 | 0          | 0          | 7.522E-221 | 0.06469759 | 3.8904E-08 | 5.4021E-52 | 2.0519E-21 | 1.435E-71  | 8.447E-190 | 3.8796E-43 | 1.8079E-28 | 13     | 93        |
| P2         | Left  | 4.56E-303 | 1.876E-51 | 3.484E-223 | 1.115E-122 | 1.404E-170 | 1.196E-119 | 2.6018E-57 | 1.1894E-55 | 2.3375E-53 | 1.3123E-25 | 2.1729E-86 | 3.7306E-37 | 7.1748E-91 | 3.4862E-89 | 14     | 100       |
| P2         | Right | 0         | 4.013E-60 | 4.3178E-53 | 7.229E-114 | 9.2886E-85 | 4.497E-116 | 1.8997E-37 | 6.3731E-37 | 0.00522466 | 7.3797E-95 | 2.663E-60  | 1.071E-101 | 7.5581E-18 | 1.288E-152 | 14     | 100       |
| P3         | Left  | 0         | 8.51E-237 | 0          | 9.9526E-64 | 1.45E-233  | 1.945E-150 | 0          | 1.779E-254 | 6.4158E-84 | 3.169E-51  | 4.7753E-31 | 8.637E-188 | 5.4533E-13 | 1.669E-18  | 14     | 100       |
| P3         | Right | 0         | 1.33E-209 | 7.564E-307 | 2.84E-191  | 4.254E-221 | 2.6547E-76 | 9.663E-238 | 1.391E-240 | 5.257E-258 | 7.393E-211 | 2.9309E-31 | 7.5458E-09 | 1.4212E-62 | 0.723005   | 13     | 93        |
| P4         | Left  | 2.96E-150 | 1.01E-137 | 3.273E-185 | 0          | 4.149E-171 | 3.6253E-58 | 1.9357E-16 | 2.7011E-49 | 1.459E-223 | 3.741E-62  | 6.4556E-68 | 1.0597E-42 | 3.022E-228 | 4.6017E-08 | 14     | 100       |
| P4         | Right | 2E-141    | 1.71E-197 | 7.584E-248 | 5.9361E-74 | 3.1899E-89 | 1.862E-49  | 2.9459E-97 | 2.076E-158 | 1.372E-161 | 9.8645E-49 | 1.8183E-75 | 1.068E-134 | 1.287E-186 | 1.3581E-43 | 14     | 100       |
| P5         | Left  | 3.74E-184 | 1.11E-291 | 1.0181E-76 | 1.1787E-30 | 2.217E-235 | 6.1846E-88 | 1.4921E-08 | 5.1103E-83 | 1.83E-183  | 2.205E-132 | 0.0517463  | 9.8979E-16 | 7.205E-115 | 0.00050075 | 13     | 93        |
| P5         | Right | 7.463E-49 | 6.43E-216 | 0          | 0          | 0          | 2.163E-22  | 9.765E-178 | 0.0239156  | 3.5864E-45 | 1.0333E-32 | 1.995E-138 | 1.234E-58  | 2.1406E-47 | 5.127E-49  | 14     | 100       |
| P6         | Left  | 6.311E-26 | 1.36E-201 | 1.4009E-97 | 2.4424E-38 | 4.278E-215 | 1.283E-136 | 3.5816E-78 | 3.3298E-21 | 8.291E-109 | 0.00175432 | 1.0251E-61 | 1.048E-143 | 3.3388E-16 | 5.538E-08  | 14     | 100       |
| P6         | Right | 1.24E-294 | 1.05E-241 | 7.7803E-76 | 3.9561E-88 | 3.414E-210 | 6.0688E-69 | 8.6302E-05 | 0          | 1.289E-126 | 9.8885E-19 | 1.1634E-55 | 1.163E-181 | 4.2126E-68 | 3.0335E-37 | 14     | 100       |
| P7         | Left  | 0         | 1.85E-150 | 1.304E-250 | 6.791E-158 | 1.226E-173 | 2.413E-118 | 2.1675E-30 | 1.0099E-63 | 2.9855E-51 | 1.6729E-81 | 4.2841E-87 | 1.136E-103 | 1.1445E-35 | 0.54198858 | 13     | 93        |
| P7         | Right | 1.21E-285 | 1.14E-146 | 1.712E-170 | 1.937E-260 | 0          | 2.9868E-75 | 2.659E-149 | 1.128E-105 | 1.247E-192 | 8.44E-102  | 4.9128E-07 | 6.3228E-47 | 1.8311E-26 | 0.33640562 | 13     | 93        |
| P8         | Left  | 3.503E-19 | 6.294E-82 | 2.5221E-64 | 8.151E-192 | 0          | 4.035E-91  | 1.1995E-15 | 5.964E-42  | 1.065E-259 | 2.097E-212 | 0.12829067 | 3.2807E-54 | 1.8443E-17 | 1.1603E-13 | 13     | 93        |
| P8         | Right | 6.552E-26 | 1.29E-109 | 1.024E-128 | 2.8311E-84 | 3.8591E-50 | 1.2734E-80 | 1.0138E-71 | 5.8707E-08 | 4.6217E-81 | 1.392E-212 | 0.0073824  | 6.389E-15  | 3.8833E-14 | 2.4824E-54 | 14     | 100       |
| p < 0.05   |       | 16        | 16        | 16         | 16         | 16         | 16         | 15         | 16         | 16         | 16         | 13         | 16         | 16         | 13         | 217    | Sum Total |
| Percentage |       | 100       | 100       | 100        | 100        | 100        | 100        | 94         | 100        | 100        | 100        | 81         | 100        | 100        | 81         | 97     | % Total   |

| $\rho$ | Hemi  | V1    | V2d   | V2v   | V3d   | V3v   | hV4   | VO-1  | VO-2  | PHC-1 | PHC-2 | LO-1   | LO-2  | TO-1  | TO-2  |
|--------|-------|-------|-------|-------|-------|-------|-------|-------|-------|-------|-------|--------|-------|-------|-------|
| P1     | Left  | 0.214 | 0.473 | 0.472 | 0.400 | 0.514 | 0.323 | 0.320 | 0.055 | 0.204 | 0.085 | 0.026  | 0.161 | 0.271 | 0.149 |
| P1     | Right | 0.372 | 0.516 | 0.407 | 0.374 | 0.241 | 0.155 | 0.143 | 0.127 | 0.166 | 0.085 | 0.013  | 0.143 | 0.285 | 0.067 |
| P2     | Left  | 0.254 | 0.164 | 0.276 | 0.242 | 0.299 | 0.260 | 0.182 | 0.269 | 0.196 | 0.142 | 0.264  | 0.152 | 0.209 | 0.256 |
| P2     | Right | 0.340 | 0.198 | 0.313 | 0.152 | 0.295 | 0.318 | 0.244 | 0.290 | 0.324 | 0.085 | 0.119  | 0.227 | 0.199 | 0.065 |
| P3     | Left  | 0.333 | 0.329 | 0.475 | 0.175 | 0.386 | 0.354 | 0.435 | 0.383 | 0.334 | 0.291 | 0.161  | 0.311 | 0.076 | 0.116 |
| P3     | Right | 0.212 | 0.313 | 0.309 | 0.302 | 0.378 | 0.165 | 0.364 | 0.446 | 0.532 | 0.307 | 0.199  | 0.110 | 0.042 | 0.073 |
| P4     | Left  | 0.206 | 0.339 | 0.318 | 0.539 | 0.332 | 0.174 | 0.143 | 0.295 | 0.422 | 0.249 | 0.217  | 0.186 | 0.423 | 0.134 |
| P4     | Right | 0.339 | 0.188 | 0.249 | 0.372 | 0.260 | 0.192 | 0.089 | 0.132 | 0.214 | 0.162 | 0.171  | 0.236 | 0.391 | 0.093 |
| P5     | Left  | 0.183 | 0.421 | 0.222 | 0.113 | 0.435 | 0.229 | 0.100 | 0.402 | 0.424 | 0.533 | 0.078  | 0.123 | 0.363 | 0.032 |
| P5     | Right | 0.298 | 0.362 | 0.165 | 0.353 | 0.457 | 0.149 | 0.227 | 0.337 | 0.373 | 0.417 | 0.074  | 0.079 | 0.537 | 0.167 |
| P6     | Left  | 0.073 | 0.326 | 0.244 | 0.124 | 0.358 | 0.301 | 0.242 | 0.070 | 0.254 | 0.101 | 0.221  | 0.196 | 0.156 | 0.092 |
| P6     | Right | 0.050 | 0.562 | 0.442 | 0.250 | 0.252 | 0.212 | 0.300 | 0.167 | 0.147 | 0.062 | 0.189  | 0.211 | 0.199 | 0.243 |
| P7     | Left  | 0.309 | 0.322 | 0.350 | 0.321 | 0.378 | 0.327 | 0.145 | 0.238 | 0.352 | 0.380 | 0.291  | 0.262 | 0.173 | 0.012 |
| P7     | Right | 0.281 | 0.300 | 0.355 | 0.443 | 0.504 | 0.403 | 0.230 | 0.225 | 0.361 | 0.422 | 0.323  | 0.166 | 0.084 | 0.075 |
| P8     | Left  | 0.086 | 0.254 | 0.175 | 0.379 | 0.515 | 0.243 | 0.097 | 0.190 | 0.358 | 0.491 | 0.021  | 0.207 | 0.161 | 0.135 |
| P8     | Right | 0.127 | 0.069 | 0.030 | 0.201 | 0.154 | 0.178 | 0.190 | 0.094 | 0.197 | 0.264 | -0.006 | 0.134 | 0.106 | 0.261 |

| n  | Hemi  | V1    | V2d  | V2v   | V3d  | V3v  | hV4  | VO-1 | VO-2 | PHC-1 | PHC-2 | LO-1 | LO-2  | TO-1 | TO-2 |
|----|-------|-------|------|-------|------|------|------|------|------|-------|-------|------|-------|------|------|
| P1 | Left  | 21444 | 9430 | 9156  | 8153 | 8287 | 7010 | 7354 | 4765 | 3033  | 3674  | 5622 | 6141  | 5750 | 4578 |
| P1 | Right | 19916 | 9448 | 12615 | 6981 | 8631 | 8550 | 4666 | 2333 | 2129  | 956   | 4613 | 4846  | 4053 | 2968 |
| P2 | Left  | 22220 | 9658 | 10305 | 8054 | 8136 | 7028 | 5225 | 3750 | 5424  | 5435  | 6940 | 6981  | 7541 | 5803 |
| P2 | Right | 18388 | 8416 | 10509 | 8870 | 7261 | 5570 | 4520 | 2228 | 2899  | 3727  | 4357 | 5529  | 5371 | 5599 |
| P3 | Left  | 21485 | 8497 | 11588 | 7045 | 6823 | 5249 | 8147 | 7558 | 2689  | 2175  | 3493 | 6993  | 7646 | 4916 |
| P3 | Right | 21158 | 9366 | 10393 | 8066 | 5844 | 5657 | 7372 | 5109 | 4327  | 7028  | 7168 | 6917  | 4537 | 2204 |
| P4 | Left  | 12836 | 6141 | 8701  | 5622 | 6602 | 6479 | 3021 | 2315 | 4916  | 5540  | 4823 | 5383  | 5523 | 1446 |
| P4 | Right | 13682 | 7138 | 7914  | 5412 | 6923 | 6205 | 3056 | 3732 | 3913  | 2455  | 6176 | 5214  | 7098 | 4036 |
| P5 | Left  | 20651 | 7179 | 6678  | 5704 | 5762 | 7325 | 3289 | 2624 | 4467  | 1709  | 3972 | 3972  | 3651 | 4957 |
| P5 | Right | 14493 | 9920 | 8398  | 6730 | 7033 | 5120 | 6882 | 2671 | 4059  | 3791  | 4683 | 7208  | 1948 | 1295 |
| P6 | Left  | 19351 | 8316 | 7687  | 9028 | 7028 | 6689 | 7273 | 9739 | 5552  | 3324  | 7307 | 12230 | 3832 | 3633 |
| P6 | Right | 16318 | 8316 | 9022  | 8241 | 8940 | 6054 | 6374 | 8112 | 7856  | 6759  | 8176 | 10445 | 4042 | 2980 |
| P7 | Left  | 18738 | 7127 | 8713  | 5855 | 4975 | 4975 | 3896 | 4520 | 1954  | 2578  | 5459 | 7173  | 3948 | 1598 |
| P7 | Right | 15892 | 6841 | 7774  | 5669 | 7028 | 4578 | 4671 | 3727 | 3814  | 3750  | 4252 | 2689  | 4911 | 3639 |
| P8 | Left  | 13087 | 6718 | 8696  | 5960 | 6590 | 6870 | 7576 | 6777 | 8655  | 3027  | 4555 | 6124  | 3184 | 2829 |
| P8 | Right | 17088 | 7850 | 9693  | 6695 | 6870 | 6188 | 4864 | 7127 | 5960  | 7226  | 5208 | 6514  | 3610 | 4211 |

**Table S11: Descriptive statistics for correlations between the cortical surface distances and representational space distances between vertices in the Within ROI model. Top: p-values of correlations in each map for each hemisphere, after correction for false discovery rate. Middle: Pearson's correlation coefficient (r) in each map. Bottom: Number of selected measurements in each map.**

| P             | Hemi  | V1        | V2d       | V2v        | V3d        | V3v        | hV4        | VO-1       | VO-2       | PHC-1      | PHC-2      | LO-1       | LO-2       | TO-1       | TO-2       | p<0.05 | %         |
|---------------|-------|-----------|-----------|------------|------------|------------|------------|------------|------------|------------|------------|------------|------------|------------|------------|--------|-----------|
| P1            | Left  | 0         | 0         | 0          | 0          | 0          | 1.477E-144 | 1.1197E-27 | 2.4751E-37 | 3.7477E-79 | 1.896E-100 | 0          | 7.872E-39  | 7.852E-108 | 3.421E-116 | 14     | 100       |
| P1            | Right | 0         | 0         | 7.739E-227 | 0          | 0          | 7.522E-221 | 0.0638233  | 3.853E-08  | 5.3315E-52 | 1.9576E-21 | 1.3819E-71 | 8.166E-190 | 3.8562E-43 | 1.7686E-28 | 13     | 93        |
| P2            | Left  | 0         | 1.596E-72 | 6.038E-189 | 9.121E-126 | 1.8692E-79 | 4.197E-124 | 4.0797E-14 | 1.016E-205 | 1.4E-82    | 6.052E-152 | 1.102E-144 | 2.2099E-05 | 6.776E-26  | 1.759E-103 | 14     | 100       |
| P2            | Right | 0         | 3.929E-60 | 4.2892E-53 | 6.667E-114 | 8.9737E-85 | 4.1E-116   | 1.8775E-37 | 6.2638E-37 | 0.00515276 | 6.7324E-95 | 2.6071E-60 | 9.834E-102 | 7.3291E-18 | 1.191E-152 | 14     | 100       |
| P3            | Left  | 0         | 5.59E-176 | 0          | 1.965E-73  | 2.44E-165  | 1.465E-194 | 4.65E-121  | 5.129E-209 | 9.489E-208 | 3.1168E-25 | 3.6272E-28 | 5.7064E-53 | 8.3905E-62 | 0.00020051 | 14     | 100       |
| P3            | Right | 0         | 1.38E-209 | 6.657E-307 | 2.744E-191 | 4.254E-221 | 2.6335E-76 | 8.672E-238 | 1.245E-240 | 4.484E-258 | 7.701E-211 | 2.8499E-31 | 7.4E-09    | 1.3908E-62 | 0.723005   | 13     | 93        |
| P4            | Left  | 3.375E-54 | 0         | 8.11E-307  | 5.607E-157 | 1.012E-124 | 6.387E-173 | 7.6481E-24 | 3.1342E-34 | 4.936E-186 | 1.2779E-70 | 8.2259E-48 | 6.1969E-08 | 3.546E-172 | 2.1094E-39 | 14     | 100       |
| P4            | Right | 1.84E-141 | 1.65E-197 | 6.742E-248 | 5.8002E-74 | 2.9699E-89 | 1.874E-49  | 2.6852E-97 | 1.941E-158 | 1.282E-161 | 9.9894E-49 | 1.804E-75  | 9.984E-135 | 1.246E-186 | 1.3499E-43 | 14     | 100       |
| P5            | Left  | 2.38E-205 | 7.686E-47 | 5.225E-153 | 1.885E-62  | 1.788E-279 | 1.777E-148 | 9.1894E-11 | 8.0013E-35 | 9.3623E-24 | 6.954E-120 | 3.8375E-44 | 3.8197E-28 | 2.249E-31  | 5.9263E-16 | 14     | 100       |
| P5            | Right | 7.558E-49 | 6.57E-216 | 0          | 0          | 0          | 2.0631E-22 | 9.765E-178 | 0.02358948 | 3.5864E-45 | 1.0159E-32 | 1.84E-138  | 1.2002E-58 | 2.154E-47  | 5.1928E-49 | 14     | 100       |
| P6            | Left  | 1.43E-261 | 5.5E-167  | 1.601E-111 | 9.859E-215 | 9.0802E-94 | 3.977E-170 | 0.00011119 | 1.198E-280 | 2.3353E-75 | 1.9339E-37 | 1.021E-101 | 1.287E-168 | 4.5185E-28 | 0.04051666 | 14     | 100       |
| P6            | Right | 1.06E-294 | 9.39E-242 | 7.7186E-76 | 3.7194E-88 | 3.553E-210 | 5.803E-69  | 8.4696E-05 | 0          | 1.207E-126 | 9.5372E-19 | 1.1398E-55 | 1.163E-181 | 4.0295E-68 | 2.9638E-37 | 14     | 100       |
| P7            | Left  | 0         | 1.08E-227 | 7.146E-174 | 0          | 1.357E-205 | 7.53E-137  | 7.2973E-57 | 5.2037E-60 | 2.965E-75  | 4.6938E-11 | 2.5938E-29 | 1.4298E-07 | 4.5365E-67 | 8.562E-06  | 14     | 100       |
| P7            | Right | 1.08E-285 | 1.07E-146 | 1.688E-170 | 1.585E-260 | 0          | 2.9405E-75 | 2.529E-149 | 1.033E-105 | 1.182E-192 | 7.743E-102 | 4.8665E-07 | 6.3621E-47 | 1.7536E-26 | 0.33489708 | 13     | 93        |
| P8            | Left  | 2.88E-31  | 2.65E-146 | 0          | 1.376E-297 | 1.021E-225 | 5.451E-256 | 4.0655E-32 | 5.6815E-43 | 1.572E-132 | 1.274E-176 | 1.647E-144 | 1.3679E-42 | 3.289E-16  | 5.1615E-11 | 14     | 100       |
| P8            | Right | 6.311E-26 | 1.18E-109 | 9.585E-129 | 2.7359E-84 | 3.8841E-50 | 1.263E-80  | 9.7595E-72 | 5.8707E-08 | 4.5835E-81 | 1.422E-212 | 0.00728127 | 6.3254E-15 | 3.8448E-14 | 2.4491E-54 | 14     | 100       |
| p < 0.05      |       | 16        | 16        | 16         | 16         | 16         | 16         | 15         | 16         | 16         | 16         | 16         | 16         | 16         | 14         | 221    | Sum Total |
| Percent targe |       | 100       | 100       | 100        | 100        | 100        | 100        | 94         | 100        | 100        | 100        | 100        | 100        | 100        | 88         | 99     | % Total   |

| $\rho$ | Hemi  | V1    | V2d   | V2v   | V3d   | V3v   | hV4   | VO-1  | VO-2  | PHC-1 | PHC-2 | LO-1  | LO-2  | TO-1  | TO-2   |
|--------|-------|-------|-------|-------|-------|-------|-------|-------|-------|-------|-------|-------|-------|-------|--------|
| P1     | Left  | 0.321 | 0.471 | 0.460 | 0.433 | 0.385 | 0.280 | 0.136 | 0.161 | 0.323 | 0.350 | 0.549 | 0.161 | 0.320 | 0.325  |
| P1     | Right | 0.401 | 0.470 | 0.293 | 0.445 | 0.421 | 0.345 | 0.029 | 0.116 | 0.354 | 0.367 | 0.264 | 0.417 | 0.214 | 0.226  |
| P2     | Left  | 0.248 | 0.171 | 0.294 | 0.288 | 0.237 | 0.283 | 0.098 | 0.470 | 0.290 | 0.345 | 0.275 | 0.062 | 0.110 | 0.287  |
| P2     | Right | 0.327 | 0.202 | 0.147 | 0.233 | 0.246 | 0.336 | 0.158 | 0.274 | 0.056 | 0.320 | 0.268 | 0.261 | 0.111 | 0.307  |
| P3     | Left  | 0.334 | 0.302 | 0.496 | 0.221 | 0.338 | 0.389 | 0.242 | 0.365 | 0.571 | 0.222 | 0.215 | 0.164 | 0.155 | 0.037  |
| P3     | Right | 0.281 | 0.330 | 0.380 | 0.319 | 0.410 | 0.248 | 0.365 | 0.426 | 0.489 | 0.354 | 0.156 | 0.078 | 0.223 | -0.004 |
| P4     | Left  | 0.130 | 0.538 | 0.362 | 0.357 | 0.265 | 0.347 | 0.161 | 0.248 | 0.422 | 0.230 | 0.173 | 0.104 | 0.414 | 0.328  |
| P4     | Right | 0.207 | 0.358 | 0.339 | 0.244 | 0.221 | 0.195 | 0.346 | 0.412 | 0.422 | 0.298 | 0.215 | 0.338 | 0.327 | 0.227  |
| P5     | Left  | 0.208 | 0.174 | 0.344 | 0.190 | 0.429 | 0.303 | 0.113 | 0.263 | 0.160 | 0.512 | 0.242 | 0.208 | 0.201 | 0.143  |
| P5     | Right | 0.127 | 0.313 | 0.440 | 0.506 | 0.458 | 0.135 | 0.308 | 0.064 | 0.256 | 0.218 | 0.352 | 0.186 | 0.306 | 0.395  |
| P6     | Left  | 0.226 | 0.273 | 0.255 | 0.311 | 0.246 | 0.326 | 0.044 | 0.338 | 0.270 | 0.171 | 0.253 | 0.234 | 0.158 | 0.040  |
| P6     | Right | 0.272 | 0.344 | 0.216 | 0.225 | 0.316 | 0.265 | 0.077 | 0.588 | 0.289 | 0.110 | 0.187 | 0.283 | 0.270 | 0.222  |
| P7     | Left  | 0.305 | 0.356 | 0.320 | 0.446 | 0.411 | 0.353 | 0.247 | 0.228 | 0.398 | 0.187 | 0.169 | 0.053 | 0.248 | 0.085  |
| P7     | Right | 0.278 | 0.301 | 0.313 | 0.464 | 0.539 | 0.265 | 0.363 | 0.373 | 0.456 | 0.362 | 0.061 | 0.264 | 0.159 | 0.003  |
| P8     | Left  | 0.075 | 0.318 | 0.402 | 0.450 | 0.400 | 0.417 | 0.132 | 0.195 | 0.251 | 0.497 | 0.325 | 0.156 | 0.127 | 0.102  |
| P8     | Right | 0.063 | 0.257 | 0.234 | 0.246 | 0.183 | 0.246 | 0.266 | 0.100 | 0.239 | 0.338 | 0.031 | 0.075 | 0.105 | 0.230  |

| n  | Hemi  | V1    | V2d  | V2v   | V3d  | V3v  | hV4  | VO-1 | VO-2 | PHC-1 | PHC-2 | LO-1 | LO-2  | TO-1 | TO-2 |
|----|-------|-------|------|-------|------|------|------|------|------|-------|-------|------|-------|------|------|
| P1 | Left  | 21444 | 9430 | 9156  | 8153 | 8287 | 7010 | 7354 | 4765 | 3033  | 3674  | 5622 | 6141  | 5750 | 4578 |
| P1 | Right | 19916 | 9448 | 12615 | 6981 | 8631 | 8550 | 4666 | 2333 | 2129  | 956   | 4613 | 4846  | 4053 | 2968 |
| P2 | Left  | 22220 | 9658 | 10305 | 8054 | 8136 | 7028 | 5225 | 3750 | 5424  | 5435  | 6940 | 6981  | 7541 | 5803 |
| P2 | Right | 18388 | 8416 | 10509 | 8870 | 7261 | 5570 | 4520 | 2228 | 2899  | 3727  | 4357 | 5529  | 5371 | 5599 |
| P3 | Left  | 21485 | 8497 | 11588 | 7045 | 6823 | 5249 | 8147 | 7558 | 2689  | 2175  | 3493 | 6993  | 7646 | 4916 |
| P3 | Right | 21158 | 9366 | 10393 | 8066 | 5844 | 5657 | 7372 | 5109 | 4327  | 7028  | 7168 | 6917  | 4537 | 2204 |
| P4 | Left  | 12836 | 6141 | 8701  | 5622 | 6602 | 6479 | 3021 | 2315 | 4916  | 5540  | 4823 | 5383  | 5523 | 1446 |
| P4 | Right | 13682 | 7138 | 7914  | 5412 | 6923 | 6205 | 3056 | 3732 | 3913  | 2455  | 6176 | 5214  | 7098 | 4036 |
| P5 | Left  | 20651 | 7179 | 6678  | 5704 | 5762 | 7325 | 3289 | 2624 | 4467  | 1709  | 3972 | 3972  | 3651 | 4957 |
| P5 | Right | 14493 | 9920 | 8398  | 6730 | 7033 | 5120 | 6882 | 2671 | 4059  | 3791  | 4683 | 7208  | 1948 | 1295 |
| P6 | Left  | 19351 | 8316 | 7687  | 9028 | 7028 | 6689 | 7273 | 9739 | 5552  | 3324  | 7307 | 12230 | 3832 | 3633 |
| P6 | Right | 16318 | 8316 | 9022  | 8241 | 8940 | 6054 | 6374 | 8112 | 7856  | 6759  | 8176 | 10445 | 4042 | 2980 |
| P7 | Left  | 18738 | 7127 | 8713  | 5855 | 4975 | 4975 | 3896 | 4520 | 1954  | 2578  | 5459 | 7173  | 3948 | 1598 |
| P7 | Right | 15892 | 6841 | 7774  | 5669 | 7028 | 4578 | 4671 | 3727 | 3814  | 3750  | 4252 | 2689  | 4911 | 3639 |
| P8 | Left  | 13087 | 6718 | 8696  | 5960 | 6590 | 6870 | 7576 | 6777 | 8655  | 3027  | 4555 | 6124  | 3184 | 2829 |
| P8 | Right | 17088 | 7850 | 9693  | 6695 | 6870 | 6188 | 4864 | 7127 | 5960  | 7226  | 5208 | 6514  | 3610 | 4211 |

**Table S12: Descriptive statistics for correlations between the cortical surface distances and representational space distances between vertices in the Between ROI model.** Top: p-values of correlations in each map for each hemisphere, after correction for false discovery rate. Middle: Pearson's correlation coefficient ( $r$ ) in each map. Bottom: Number of selected measurements in each map.

| P          | Hemi  | V1          | V2d         | V2v          | V3d          | V3v          | hV4          | VO-1         | VO-2         | PHC-1        | PHC-2        | LO-1         | LO-2         | TO-1         | TO-2         | p<0.05 | %         |
|------------|-------|-------------|-------------|--------------|--------------|--------------|--------------|--------------|--------------|--------------|--------------|--------------|--------------|--------------|--------------|--------|-----------|
| P1         | Left  | 5.09E-174   | 7.7E-203    | 4.954E-164   | 1.582E-230   | 0            | 9.4497E-82   | 2.0135E-29   | 1.0779E-06   | 1.1841E-06   | 9.3869E-06   | 0.011394E-8  | 0.6976340E-4 | 2.6438E-18   | 1.8114E-19   | 13     | 93        |
| P1         | Right | 4.54E-263   | 6.29E-196   | 4.9E-189     | 1.504E-121   | 5.749E-134   | 1.4056E-72   | 1.797E-18    | 4.1215E-05   | 7.9838E-07   | 0.0930624E-3 | 6.0357E-05   | 0.0009640E-4 | 1.8071E-05   | 0.6799782E-1 | 12     | 86        |
| P2         | Left  | 2.077E-20   | 4.96E-07    | 2.8308E-13   | 2.4714E-30   | 5.355E-27    | 3.6926E-11   | 0.2293557E-4 | 0.0117024E-7 | 6.122E-10    | 1.5905E-07   | 0.0023434E-6 | 0.3765400E-4 | 7.0321E-18   | 2.1853E-47   | 12     | 86        |
| P2         | Right | 0.006583E-7 | 5.591E-09   | 6.2651E-06   | 0.1394047E-8 | 0.0002959E-2 | 0.9216214E-9 | 0.0159264E-7 | 0.0432710E-4 | 9.6765E-06   | 0.3573999E-3 | 0.7961469E-6 | 1.3439E-06   | 0.1582750E-9 | 3.1612E-09   | 9      | 64        |
| P3         | Left  | 4.62E-85    | 0.826236    | 6.8845E-07   | 0.7306306E-8 | 1.7711E-49   | 3.7125E-55   | 0.0371083E-2 | 1.8796E-15   | 0.0063227E-7 | 2.3951E-10   | 0.0001017E-1 | 0.0822372E-3 | 0.8426038E-7 | 7.0472E-08   | 10     | 71        |
| P3         | Right | 0.076808E-7 | 3.251E-05   | 9.6297E-09   | 0.0006381E-3 | 0.1169899E-5 | 2.856E-90    | 5.6387E-07   | 2.7577E-06   | 0.0011340E-1 | 2.9449E-05   | 5.9964E-06   | 0.8230121E-8 | 0.6418391E-6 | 1.591E-05    | 10     | 71        |
| P4         | Left  | 5.18E-144   | 0.498500E-1 | 6.583E-07    | 3.4202E-70   | 6.6352E-44   | 9.0315E-11   | 0.5066193E-7 | 0.5755826E-4 | 2.8147E-23   | 4.7474E-07   | 7.3452E-24   | 1.4806E-10   | 0.1095063E-3 | 2.3607E-05   | 10     | 71        |
| P4         | Right | 4.443E-41   | 0.121393E-8 | 0.0008542E-1 | 5.6059E-33   | 0.4221455E-4 | 0.0010786E-7 | 1.3294E-06   | 0.0596909E-1 | 0.2627315E-1 | 1.0299E-22   | 1.4148E-38   | 9.6811E-15   | 0.0006381E-3 | 6.5199E-10   | 10     | 71        |
| P5         | Left  | 0           | 1.04E-200   | 1.252E-111   | 4.8379E-65   | 3.294E-196   | 1.421E-186   | 2.864E-27    | 7.8714E-21   | 6.2771E-16   | 7.3971E-16   | 0.0005968E-6 | 0.0014177E-6 | 2.9142E-05   | 0.0009549E-4 | 14     | 100       |
| P5         | Right | 0           | 8.9E-224    | 1.6328E-69   | 8.823E-159   | 1.315E-212   | 5.0749E-66   | 1.6371E-69   | 8.0284E-33   | 9.5108E-49   | 2.9412E-20   | 3.3596E-12   | 0.1519519E-2 | 8.2386E-07   | 0.6560743E-4 | 12     | 86        |
| P6         | Left  | 0.000379E-2 | 8.049E-06   | 0.9207015E-6 | 0.3266563E-8 | 1.7724E-05   | 0.1135750E-8 | 0.7230911E-8 | 0.5683742E-4 | 0.8770321E-7 | 0.9414164E-7 | 0.7053376E-1 | 0.1070510E-4 | 0.3266563E-8 | 0.9449135E-4 | 3      | 21        |
| P6         | Right | 0.241445E-2 | 0.641839E-2 | 0.3232019E-6 | 0.5066193E-4 | 0.5683742E-4 | 0.6666782E-6 | 0.5066193E-4 | 0.6560743E-4 | 0.6911026E-9 | 0.6207983E-7 | 0.5755826E-7 | 0.0623414E-7 | 0.4600850E-9 | 0.3795901E-4 | 0      | 0         |
| P7         | Left  | 2.541E-31   | 5.4E-32     | 0.0094279E-6 | 0.0010303E-6 | 5.652E-36    | 0.3673173E-8 | 0.4948829E-6 | 1.0767E-20   | 0.0065916E-8 | 3.8753E-12   | 0.5361631E-5 | 1.1793E-81   | 0.4050049E-6 | 0.1127495E-3 | 9      | 64        |
| P7         | Right | 2.864E-27   | 4.452E-63   | 5.2024E-30   | 1.5535E-09   | 2.4116E-33   | 0.0763006E-3 | 4.1323E-26   | 7.6834E-53   | 8.5016E-28   | 0.3802126E-1 | 0.0598367E-6 | 1.6002E-06   | 2.5724E-06   | 0.0030037E-5 | 11     | 79        |
| P8         | Left  | 0.036742E-8 | 0.340296E-5 | 0.0004555E-8 | 0.0325164E-9 | 0.0439844E-6 | 0.6484552E-5 | 0.5798546E-7 | 0.7175609E-4 | 0.0065837E-4 | 1.9255E-05   | 0.8160153E-2 | 0.1986781E-5 | 0.6229230E-3 | 0.8294215E-3 | 6      | 43        |
| P8         | Right | 0.491360E-4 | 0.816015E-3 | 0.5066193E-8 | 0.9514826E-8 | 0.6911026E-9 | 0.3203451E-9 | 0.6229230E-3 | 0.5585728E-1 | 0.0016069E-5 | 0.5066193E-8 | 0.6895364E-8 | 0.6560743E-4 | 0.8684135E-7 | 0.0519618E-4 | 1      | 7         |
| p < 0.05   |       | 13          | 10          | 13           | 11           | 12           | 9            | 9            | 10           | 13           | 10           | 9            | 7            | 7            | 9            | 142    | Sum Total |
| Percentage |       | 81          | 63          | 81           | 69           | 75           | 56           | 56           | 63           | 81           | 63           | 56           | 44           | 44           | 56           | 63     | % Total   |

| $\rho$ | Hemi  | V1     | V2d    | V2v    | V3d    | V3v    | hV4    | VO-1   | VO-2   | PHC-1  | PHC-2  | LO-1   | LO-2   | TO-1   | TO-2   |
|--------|-------|--------|--------|--------|--------|--------|--------|--------|--------|--------|--------|--------|--------|--------|--------|
| P1     | Left  | -0.441 | -0.662 | -0.617 | -0.729 | -0.798 | -0.516 | -0.313 | -0.176 | -0.219 | 0.182  | 0.087  | -0.014 | -0.277 | 0.319  |
| P1     | Right | -0.546 | -0.653 | -0.575 | -0.609 | -0.582 | -0.449 | -0.308 | -0.211 | -0.264 | 0.146  | 0.148  | -0.120 | 0.168  | 0.022  |
| P2     | Left  | 0.151  | 0.128  | 0.176  | 0.305  | 0.286  | -0.194 | -0.046 | 0.106  | -0.206 | -0.176 | -0.093 | 0.031  | -0.240 | 0.439  |
| P2     | Right | 0.051  | 0.157  | -0.110 | 0.042  | 0.107  | -0.004 | 0.093  | -0.113 | 0.204  | 0.044  | -0.012 | 0.162  | 0.052  | 0.195  |
| P3     | Left  | 0.316  | -0.007 | 0.115  | 0.012  | 0.416  | 0.492  | 0.061  | 0.222  | -0.135 | 0.328  | 0.165  | 0.055  | 0.006  | 0.190  |
| P3     | Right | -0.032 | 0.107  | 0.139  | 0.096  | 0.055  | 0.588  | 0.145  | 0.163  | 0.125  | 0.125  | 0.134  | 0.008  | -0.021 | 0.228  |
| P4     | Left  | -0.509 | 0.026  | -0.133 | -0.531 | -0.400 | -0.198 | 0.036  | 0.035  | -0.337 | -0.168 | 0.345  | 0.214  | -0.058 | -0.275 |
| P4     | Right | -0.275 | -0.049 | 0.095  | -0.383 | -0.028 | -0.105 | 0.217  | 0.082  | 0.051  | -0.459 | 0.388  | 0.260  | 0.103  | 0.238  |
| P5     | Left  | 0.598  | -0.726 | -0.600 | -0.510 | -0.774 | -0.703 | -0.439 | 0.428  | 0.291  | 0.455  | 0.138  | -0.128 | 0.173  | -0.119 |
| P5     | Right | 0.673  | -0.674 | -0.443 | -0.684 | -0.745 | -0.538 | -0.484 | 0.523  | 0.520  | 0.356  | 0.248  | -0.046 | -0.275 | -0.037 |
| P6     | Left  | -0.064 | -0.120 | -0.003 | 0.030  | 0.128  | 0.052  | 0.012  | -0.017 | 0.006  | 0.004  | 0.013  | 0.039  | 0.046  | -0.003 |
| P6     | Right | 0.026  | -0.016 | 0.030  | -0.022 | -0.018 | 0.016  | 0.025  | -0.015 | -0.013 | 0.018  | -0.019 | -0.048 | 0.035  | 0.047  |
| P7     | Left  | 0.206  | 0.331  | 0.072  | -0.109 | -0.414 | 0.037  | -0.033 | 0.331  | -0.157 | -0.329 | -0.025 | 0.511  | -0.039 | 0.107  |
| P7     | Right | -0.208 | 0.465  | 0.308  | 0.197  | -0.340 | 0.070  | 0.366  | 0.558  | -0.414 | -0.041 | 0.077  | 0.229  | 0.167  | 0.125  |
| P8     | Left  | -0.048 | 0.034  | 0.095  | -0.073 | 0.065  | 0.017  | -0.019 | -0.013 | -0.075 | 0.193  | -0.010 | -0.045 | 0.026  | -0.012 |
| P8     | Right | -0.016 | -0.008 | 0.020  | -0.002 | 0.014  | -0.037 | 0.021  | 0.021  | -0.104 | -0.023 | 0.016  | -0.016 | 0.008  | 0.079  |

| n  | Hemi  | V1   | V2d  | V2v  | V3d  | V3v  | hV4  | VO-1 | VO-2 | PHC-1 | PHC-2 | LO-1 | LO-2 | TO-1 | TO-2 |
|----|-------|------|------|------|------|------|------|------|------|-------|-------|------|------|------|------|
| P1 | Left  | 3677 | 1617 | 1570 | 1398 | 1421 | 1202 | 1261 | 817  | 520   | 630   | 964  | 1053 | 986  | 785  |
| P1 | Right | 3415 | 1620 | 2163 | 1197 | 1480 | 1466 | 800  | 400  | 365   | 164   | 791  | 831  | 695  | 509  |
| P2 | Left  | 3810 | 1656 | 1767 | 1381 | 1395 | 1205 | 896  | 643  | 930   | 932   | 1190 | 1197 | 1293 | 995  |
| P2 | Right | 3153 | 1443 | 1802 | 1521 | 1245 | 955  | 775  | 382  | 497   | 639   | 747  | 948  | 921  | 960  |
| P3 | Left  | 3684 | 1457 | 1987 | 1208 | 1170 | 900  | 1397 | 1296 | 461   | 373   | 599  | 1199 | 1311 | 843  |
| P3 | Right | 3628 | 1606 | 1782 | 1383 | 1002 | 970  | 1264 | 876  | 742   | 1205  | 1229 | 1186 | 778  | 378  |
| P4 | Left  | 2201 | 1053 | 1492 | 964  | 1132 | 1111 | 518  | 397  | 843   | 950   | 827  | 923  | 947  | 248  |
| P4 | Right | 2346 | 1224 | 1357 | 928  | 1187 | 1064 | 524  | 640  | 671   | 421   | 1059 | 894  | 1217 | 692  |
| P5 | Left  | 3541 | 1231 | 1145 | 978  | 988  | 1256 | 564  | 450  | 766   | 293   | 681  | 681  | 626  | 850  |
| P5 | Right | 2485 | 1701 | 1440 | 1154 | 1206 | 878  | 1180 | 458  | 696   | 650   | 803  | 1236 | 334  | 222  |
| P6 | Left  | 3333 | 1495 | 1318 | 1548 | 1205 | 1147 | 1247 | 1670 | 952   | 570   | 1253 | 2097 | 657  | 623  |
| P6 | Right | 2783 | 1357 | 1547 | 1413 | 1533 | 1038 | 1093 | 1391 | 1347  | 1159  | 1402 | 1791 | 693  | 511  |
| P7 | Left  | 3213 | 1222 | 1494 | 1004 | 853  | 853  | 668  | 775  | 335   | 442   | 936  | 1230 | 677  | 274  |
| P7 | Right | 2725 | 1173 | 1333 | 972  | 1205 | 785  | 801  | 639  | 654   | 643   | 729  | 461  | 842  | 624  |
| P8 | Left  | 2289 | 1152 | 1491 | 1022 | 1130 | 1178 | 1299 | 1162 | 1484  | 519   | 781  | 1050 | 546  | 485  |
| P8 | Right | 2885 | 1346 | 1662 | 1148 | 1178 | 1061 | 834  | 1222 | 1022  | 1239  | 893  | 1117 | 619  | 722  |

**Table S13: Descriptive statistics for correlations between the preferred representational space position x0 and visual field position eccentricity in the Within ROI model.** Top: p-values of correlations in each map for each hemisphere, after correction for false discovery rate. Middle: Pearson's correlation coefficient (r) in each map. Bottom: Number of selected measurements in each map.

| P           | Hemi  | V1        | V2d       | V2v        | V3d        | V3v        | hV4        | VO-1       | VO-2       | PHC-1      | PHC-2      | LO-1       | LO-2       | TO-1       | TO-2       | p<0.05     | %         |    |
|-------------|-------|-----------|-----------|------------|------------|------------|------------|------------|------------|------------|------------|------------|------------|------------|------------|------------|-----------|----|
| P1          | Left  | 2.036E-22 | 4.761E-36 | 4.4738E-65 | 3.3549E-12 | 3.9995E-05 | 4.1833E-09 | 0.13321623 | 0.01081351 | 7.8149E-07 | 0.6053685  | 0.0954007  | 2.3533E-10 | 8.7953E-05 | 0.00010719 | 11         | 79        |    |
| P1          | Right | 1.152E-75 | 7.008E-28 | 8.0425E-64 | 1.0943E-23 | 0.00065639 | 0.00456462 | 0.53614608 | 0.06737914 | 0.05213643 | 0.48945223 | 0.35206464 | 0.55466943 | 0.72897884 | 0.00015484 | 7          | 50        |    |
| P2          | Left  | 1.088E-33 | 0.4821027 | 2.1378E-59 | 0.00011984 | 0.00244116 | 2.3409E-16 | 0.246187   | 0.49938263 | 5.9909E-08 | 0.85576947 | 1.0483E-32 | 0.03905361 | 2.3779E-09 | 2.5601E-07 | 10         | 71        |    |
| P2          | Right | 2.109E-30 | 0.0870181 | 1.0397E-05 | 0.56872153 | 0.06737914 | 1.3987E-33 | 0.010224   | 7.5226E-09 | 1.24E-06   | 0.44100883 | 7.9336E-18 | 3.5397E-24 | 0.03988764 | 0.00059212 | 10         | 71        |    |
| P3          | Left  | 5.492E-15 | 2.839E-10 | 6.5761E-59 | 2.2275E-10 | 1.9025E-16 | 1.7647E-07 | 1.412E-47  | 8.2488E-37 | 2.6786E-26 | 2.4962E-11 | 1.7283E-13 | 0.0040576  | 0.01332459 | 0.2042299  | 13         | 93        |    |
| P3          | Right | 3.611E-34 | 1.515E-05 | 3.2057E-18 | 1.9055E-24 | 5.2448E-10 | 0.02045718 | 4.8122E-17 | 1.2739E-29 | 1.0175E-05 | 0.1235511  | 3.2605E-19 | 0.42418249 | 0.6410767  | 0.61474657 | 10         | 71        |    |
| P4          | Left  | 5.987E-05 | 0.4460992 | 2.5274E-22 | 3.9882E-08 | 0.20225459 | 0.246187   | 0.84190233 | 0.00316919 | 5.1471E-11 | 0.58457258 | 0.00013584 | 0.78420365 | 2.7392E-09 | 0.05956128 | 7          | 50        |    |
| P4          | Right | 3.904E-31 | 0.0041366 | 3.8318E-10 | 7.8081E-07 | 0.15678724 | 0.03791695 | 0.36068204 | 0.05956128 | 0.09032314 | 0.00063296 | 0.00699332 | 1.8381E-05 | 0.09036846 | 0.04507393 | 9          | 64        |    |
| P5          | Left  | 1.368E-12 | 4.375E-07 | 2.2834E-10 | 7.68E-10   | 7.9336E-18 | 1.2817E-10 | 0.05956128 | 1.5113E-13 | 1.9686E-07 | 0.30306658 | 0.03637295 | 0.5361460  | 8          | 1.137E-21  | 0.37114037 | 10        | 71 |
| P5          | Right | 9.616E-07 | 0.0050816 | 6.3371E-09 | 0.05259241 | 2.1633E-05 | 0.00125019 | 2.3769E-11 | 4.0046E-12 | 0.00776855 | 0.00396331 | 0.61474657 | 0.08080001 | 0.000108   | 0.78836978 | 10         | 71        |    |
| P6          | Left  | 6.375E-05 | 0.0154939 | 0.68184655 | 0.36068204 | 0.76447438 | 0.06105656 | 0.95162921 | 0.21570827 | 0.60192308 | 0.95235363 | 0.5118293  | 0.49577264 | 0.01690836 | 0.78738632 | 3          | 21        |    |
| P6          | Right | 0.9241162 | 0.3510247 | 0.87703105 | 0.5244592  | 0.0441797  | 0.889041   | 0.31868289 | 0.74954721 | 0.78738632 | 0.96374244 | 0.6868080  | 0.02284546 | 0.09036846 | 0.0441797  | 3          | 21        |    |
| P7          | Left  | 6.277E-37 | 5.899E-09 | 1.2426E-27 | 2.0789E-20 | 8.9315E-10 | 4.3318E-47 | 0.00091394 | 1.0983E-12 | 7.5733E-07 | 4.8573E-08 | 0.00074175 | 1.3206E-22 | 0.06737914 | 0.50183507 | 12         | 86        |    |
| P7          | Right | 6.435E-37 | 3.644E-16 | 3.1518E-39 | 9.8045E-13 | 8.3063E-46 | 3.9357E-47 | 0.00046258 | 0.40775346 | 2.853E-17  | 3.5175E-48 | 6.7462E-43 | 0.01245049 | 0.00280805 | 0.23318552 | 12         | 86        |    |
| P8          | Left  | 0.5118293 | 0.7559548 | 0.0954007  | 0.05213643 | 0.09036846 | 0.53614608 | 0.82057866 | 0.5244592  | 0.49005354 | 0.00970844 | 0.82057866 | 0.8026947  | 0.57787927 | 0.96374244 | 1          | 7         |    |
| P8          | Right | 0.3274894 | 0.1187001 | 0.15101496 | 0.8108425  | 0.19962978 | 0.3613096  | 0.34678462 | 0.78836978 | 0.15765463 | 0.0441797  | 0.62783505 | 0.33473327 | 0.34677527 | 0.52329943 | 1          | 7         |    |
| p < 0.05    |       | 13        | 10        | 12         | 10         | 10         | 11         | 6          | 8          | 10         | 7          | 9          | 8          | 9          | 6          | 129        | Sum Total |    |
| Percent age |       | 81        | 63        | 75         | 63         | 63         | 69         | 38         | 50         | 63         | 44         | 56         | 50         | 56         | 38         | 58         | % Total   |    |

| $\rho$ | Hemi  | V1     | V2d    | V2v    | V3d    | V3v    | hV4    | VO-1   | VO-2   | PHC-1  | PHC-2  | LO-1   | LO-2   | TO-1   | TO-2   |
|--------|-------|--------|--------|--------|--------|--------|--------|--------|--------|--------|--------|--------|--------|--------|--------|
| P1     | Left  | 0.163  | 0.309  | 0.417  | 0.190  | 0.114  | 0.174  | 0.048  | -0.097 | 0.223  | 0.025  | -0.060 | 0.200  | -0.131 | 0.145  |
| P1     | Right | 0.312  | 0.272  | 0.356  | 0.290  | 0.094  | -0.080 | -0.027 | 0.102  | 0.113  | 0.068  | -0.040 | 0.025  | -0.017 | 0.176  |
| P2     | Left  | 0.197  | 0.022  | -0.378 | 0.109  | 0.087  | -0.239 | 0.045  | 0.033  | 0.183  | -0.007 | -0.341 | -0.066 | 0.171  | -0.169 |
| P2     | Right | 0.205  | -0.051 | -0.109 | -0.018 | -0.058 | -0.383 | 0.100  | 0.300  | 0.224  | 0.037  | -0.314 | -0.327 | -0.075 | -0.118 |
| P3     | Left  | 0.132  | 0.169  | 0.356  | 0.187  | 0.243  | 0.180  | 0.379  | 0.347  | 0.474  | 0.346  | 0.303  | -0.108 | 0.075  | -0.051 |
| P3     | Right | 0.204  | 0.113  | 0.209  | 0.275  | 0.201  | 0.082  | 0.238  | 0.375  | 0.169  | 0.050  | 0.257  | 0.028  | -0.020 | -0.031 |
| P4     | Left  | 0.090  | -0.029 | 0.253  | -0.182 | -0.044 | -0.041 | -0.010 | -0.159 | 0.231  | 0.022  | -0.139 | -0.012 | -0.198 | 0.133  |
| P4     | Right | -0.240 | 0.088  | 0.174  | -0.168 | -0.047 | -0.071 | 0.048  | -0.083 | -0.073 | -0.176 | -0.090 | -0.150 | -0.054 | -0.085 |
| P5     | Left  | 0.122  | -0.149 | -0.192 | -0.201 | -0.275 | -0.186 | -0.089 | -0.348 | -0.194 | -0.072 | 0.089  | 0.029  | 0.376  | 0.037  |
| P5     | Right | -0.102 | 0.073  | -0.157 | 0.064  | -0.128 | -0.116 | -0.199 | -0.326 | 0.109  | -0.122 | 0.022  | 0.056  | 0.221  | 0.022  |
| P6     | Left  | -0.073 | 0.068  | -0.014 | -0.028 | -0.011 | -0.062 | 0.002  | -0.035 | 0.021  | -0.003 | -0.023 | -0.018 | 0.102  | -0.014 |
| P6     | Right | -0.002 | 0.030  | 0.005  | -0.021 | -0.057 | 0.005  | 0.036  | 0.011  | -0.009 | 0.001  | -0.013 | 0.059  | -0.072 | 0.099  |
| P7     | Left  | 0.225  | -0.171 | -0.281 | -0.292 | -0.214 | 0.472  | -0.136 | -0.259 | 0.277  | 0.265  | -0.117 | -0.279 | 0.078  | 0.050  |
| P7     | Right | 0.244  | -0.240 | -0.353 | -0.233 | -0.399 | 0.490  | -0.131 | -0.040 | 0.330  | 0.539  | -0.485 | -0.127 | -0.111 | -0.056 |
| P8     | Left  | -0.017 | 0.012  | -0.048 | 0.068  | -0.056 | 0.022  | -0.008 | 0.023  | -0.022 | -0.123 | 0.010  | 0.009  | -0.029 | -0.002 |
| P8     | Right | 0.022  | -0.048 | -0.040 | 0.009  | -0.043 | 0.033  | 0.039  | 0.009  | 0.050  | 0.064  | -0.020 | 0.035  | 0.046  | -0.029 |

| n  | Hemi  | V1   | V2d  | V2v  | V3d  | V3v  | hV4  | VO-1 | VO-2 | PHC-1 | PHC-2 | LO-1 | LO-2 | TO-1 | TO-2 |
|----|-------|------|------|------|------|------|------|------|------|-------|-------|------|------|------|------|
| P1 | Left  | 3677 | 1617 | 1570 | 1398 | 1421 | 1202 | 1261 | 817  | 520   | 630   | 964  | 1053 | 986  | 785  |
| P1 | Right | 3415 | 1620 | 2163 | 1197 | 1480 | 1466 | 800  | 400  | 365   | 164   | 791  | 831  | 695  | 509  |
| P2 | Left  | 3810 | 1656 | 1767 | 1381 | 1395 | 1205 | 896  | 643  | 930   | 932   | 1190 | 1197 | 1293 | 995  |
| P2 | Right | 3153 | 1443 | 1802 | 1521 | 1245 | 955  | 775  | 382  | 497   | 639   | 747  | 948  | 921  | 960  |
| P3 | Left  | 3684 | 1457 | 1987 | 1208 | 1170 | 900  | 1397 | 1296 | 461   | 373   | 599  | 1199 | 1311 | 843  |
| P3 | Right | 3628 | 1606 | 1782 | 1383 | 1002 | 970  | 1264 | 876  | 742   | 1205  | 1229 | 1186 | 778  | 378  |
| P4 | Left  | 2201 | 1053 | 1492 | 964  | 1132 | 1111 | 518  | 397  | 843   | 950   | 827  | 923  | 947  | 248  |
| P4 | Right | 2346 | 1224 | 1357 | 928  | 1187 | 1064 | 524  | 640  | 671   | 421   | 1059 | 894  | 1217 | 692  |
| P5 | Left  | 3541 | 1231 | 1145 | 978  | 988  | 1256 | 564  | 450  | 766   | 293   | 681  | 681  | 626  | 850  |
| P5 | Right | 2485 | 1701 | 1440 | 1154 | 1206 | 878  | 1180 | 458  | 696   | 650   | 803  | 1236 | 334  | 222  |
| P6 | Left  | 3333 | 1495 | 1318 | 1548 | 1205 | 1147 | 1247 | 1670 | 952   | 570   | 1253 | 2097 | 657  | 623  |
| P6 | Right | 2783 | 1357 | 1547 | 1413 | 1533 | 1038 | 1093 | 1391 | 1347  | 1159  | 1402 | 1791 | 693  | 511  |
| P7 | Left  | 3213 | 1222 | 1494 | 1004 | 853  | 853  | 668  | 775  | 335   | 442   | 936  | 1230 | 677  | 274  |
| P7 | Right | 2725 | 1173 | 1333 | 972  | 1205 | 785  | 801  | 639  | 654   | 643   | 729  | 461  | 842  | 624  |
| P8 | Left  | 2289 | 1152 | 1491 | 1022 | 1130 | 1178 | 1299 | 1162 | 1484  | 519   | 781  | 1050 | 546  | 485  |
| P8 | Right | 2885 | 1346 | 1662 | 1148 | 1178 | 1061 | 834  | 1222 | 1022  | 1239  | 893  | 1117 | 619  | 722  |

**Table S14: Descriptive statistics for correlations between the preferred representational space position  $y_0$  and visual field position eccentricity in the Within ROI model.** Top: p-values of correlations in each map for each hemisphere, after correction for false discovery rate. Middle: Pearson's correlation coefficient ( $r$ ) in each map. Bottom: Number of selected measurement in each map.

| P          | Hemi  | V1        | V2d       | V2v        | V3d        | V3v        | hV4        | VO-1       | VO-2       | PHC-1      | PHC-2      | LO-1       | LO-2       | TO-1       | TO-2       | p<0.05 | %         |
|------------|-------|-----------|-----------|------------|------------|------------|------------|------------|------------|------------|------------|------------|------------|------------|------------|--------|-----------|
| P1         | Left  | 0         | 1.43E-268 | 1.45E-294  | 7.59E-139  | 1.48E-151  | 1.62E-95   | 2.12E-59   | 2.90E-40   | 2.64E-12   | 2.63E-39   | 7.99E-115  | 5.06E-07   | 2.93E-05   | 7.42E-23   | 14     | 100       |
| P1         | Right | 0         | 5.06E-210 | 2.09E-173  | 1.70E-165  | 4.24E-135  | 2.91E-136  | 8.62E-25   | 0.00714908 | 0.19051854 | 0.00013919 | 1.01E-15   | 3.37E-09   | 0.00105544 | 0.00071485 | 13     | 93        |
| P2         | Left  | 2.47E-17  | 0.0020091 | 1.72E-10   | 0.04321924 | 4.12E-11   | 1.12E-68   | 0.86381973 | 0.00057668 | 0.16931405 | 0.03277049 | 8.33E-38   | 0.00755786 | 2.13E-06   | 1.17E-54   | 12     | 86        |
| P2         | Right | 0.0010371 | 0.1714788 | 8.21E-05   | 5.15E-07   | 0.00010521 | 1.98E-09   | 0.644039   | 0.34442179 | 0.02442822 | 0.02631919 | 6.94E-14   | 0.07284894 | 0.81869658 | 0.00164387 | 9      | 64        |
| P3         | Left  | 4.42E-29  | 1.30E-11  | 3.43E-26   | 0.12685377 | 0.00027896 | 1.02E-09   | 3.33E-43   | 7.57E-05   | 0.45650797 | 0.00129176 | 2.23E-14   | 0.00057889 | 2.96E-21   | 0.52393465 | 11     | 79        |
| P3         | Right | 0.000217  | 2.83E-24  | 3.71E-08   | 1.29E-11   | 4.33E-05   | 1.80E-07   | 3.22E-29   | 7.82E-06   | 0.87632655 | 2.44E-06   | 2.29E-05   | 0.11895974 | 0.05723945 | 0.50445238 | 10     | 71        |
| P4         | Left  | 3.05E-18  | 1.76E-47  | 2.39E-76   | 4.70E-06   | 5.29E-26   | 4.01E-89   | 0.97061546 | 0.00166017 | 1.65E-18   | 0.21037721 | 1.67E-16   | 1.64E-24   | 0.34767974 | 0.91720694 | 10     | 71        |
| P4         | Right | 2.96E-17  | 7.49E-54  | 0.0167462  | 0.00403454 | 0.0001172  | 0.03118116 | 0.20693157 | 1.51E-13   | 2.32E-17   | 7.31E-24   | 5.30E-35   | 7.26E-23   | 2.53E-07   | 4.74E-13   | 13     | 93        |
| P5         | Left  | 0         | 5.55E-134 | 3.86E-148  | 8.74E-54   | 2.77E-269  | 9.67E-207  | 1.01E-13   | 4.11E-13   | 5.50E-09   | 5.91E-07   | 0.00027788 | 3.07E-05   | 4.05E-13   | 0.03370248 | 14     | 100       |
| P5         | Right | 2.08E-171 | 2.82E-220 | 0          | 9.84E-201  | 2.28E-195  | 1.39E-70   | 4.65E-84   | 0.03597536 | 2.90E-21   | 1.82E-09   | 1.36E-14   | 9.12E-16   | 1.40E-07   | 0.11597529 | 13     | 93        |
| P6         | Left  | 0.0046174 | 6.30E-14  | 2.89E-05   | 2.17E-15   | 0.99462375 | 0.94554086 | 0.39001051 | 0.19152655 | 0.0587887  | 0.25991018 | 0.3476797  | 0.0038630  | 0.38194079 | 0.69086423 | 5      | 36        |
| P6         | Right | 0.8569603 | 0.6051001 | 0.23135256 | 0.91198004 | 0.02286528 | 0.31528019 | 0.23092762 | 0.89731065 | 0.23949929 | 0.16645815 | 0.20520185 | 0.40427036 | 0.64017378 | 0.80210813 | 1      | 7         |
| P7         | Left  | 0.450146  | 0.0014549 | 0.07414594 | 9.57E-07   | 0.00017229 | 3.25E-13   | 9.32E-07   | 1.77E-31   | 3.60E-08   | 0.00564247 | 2.87E-13   | 9.12E-19   | 1.55E-33   | 0.8435599  | 11     | 79        |
| P7         | Right | 5.16E-31  | 4.08E-21  | 0.04887016 | 1.28E-09   | 1.85E-05   | 1.20E-20   | 4.44E-48   | 8.99E-52   | 2.24E-60   | 1.56E-33   | 0.00441114 | 0.75222841 | 6.78E-12   | 0.39517597 | 12     | 86        |
| P8         | Left  | 0.0005018 | 0.0158821 | 0.00173273 | 0.02778254 | 0.05878878 | 0.57704124 | 0.00674905 | 0.12395728 | 0.80578199 | 7.18E-06   | 0.2208946  | 0.12162924 | 0.06076522 | 0.00061211 | 7      | 50        |
| P8         | Right | 0.2431921 | 0.0823263 | 0.41617745 | 0.03479903 | 0.59487075 | 0.85976872 | 0.21793998 | 0.05805746 | 0.44411054 | 0.74153155 | 0.23358012 | 0.89731065 | 0.11597529 | 0.30201126 | 1      | 7         |
| p < 0.05   |       | 13        | 13        | 13         | 14         | 13         | 12         | 9          | 11         | 8          | 12         | 12         | 10         | 9          | 7          | 156    | Sum Total |
| Percentage |       | 81        | 81        | 81         | 88         | 81         | 75         | 56         | 69         | 50         | 75         | 75         | 63         | 56         | 44         | 70     | % Total   |

| $\rho$ | Hemi  | V1     | V2d    | V2v    | V3d    | V3v    | hV4    | VO-1   | VO-2   | PHC-1  | PHC-2  | LO-1   | LO-2   | TO-1   | TO-2   |
|--------|-------|--------|--------|--------|--------|--------|--------|--------|--------|--------|--------|--------|--------|--------|--------|
| P1     | Left  | -0.647 | -0.731 | -0.760 | -0.604 | -0.622 | -0.551 | 0.438  | 0.445  | 0.306  | -0.494 | -0.648 | -0.159 | 0.138  | -0.346 |
| P1     | Right | -0.704 | -0.670 | -0.555 | -0.685 | -0.584 | -0.588 | 0.357  | 0.142  | 0.076  | -0.305 | -0.285 | -0.208 | -0.130 | -0.156 |
| P2     | Left  | -0.139 | 0.079  | 0.155  | 0.058  | 0.179  | 0.477  | -0.007 | -0.141 | -0.050 | 0.075  | -0.364 | -0.081 | 0.136  | -0.469 |
| P2     | Right | -0.061 | 0.040  | 0.096  | -0.132 | 0.114  | 0.197  | -0.019 | 0.054  | 0.108  | -0.094 | 0.274  | 0.063  | -0.009 | -0.106 |
| P3     | Left  | 0.185  | 0.180  | 0.237  | 0.048  | 0.111  | 0.207  | 0.360  | 0.114  | -0.039 | 0.174  | -0.311 | -0.104 | 0.261  | -0.025 |
| P3     | Right | 0.064  | 0.253  | 0.133  | -0.184 | 0.134  | 0.171  | 0.312  | 0.156  | 0.007  | 0.140  | -0.125 | -0.049 | 0.074  | 0.039  |
| P4     | Left  | 0.187  | -0.429 | -0.455 | -0.152 | -0.310 | -0.553 | -0.002 | -0.165 | 0.301  | 0.045  | -0.286 | -0.332 | 0.034  | -0.008 |
| P4     | Right | -0.176 | -0.424 | -0.069 | -0.099 | -0.116 | -0.071 | 0.061  | 0.292  | -0.324 | -0.470 | -0.370 | -0.325 | 0.151  | -0.275 |
| P5     | Left  | -0.707 | -0.626 | -0.669 | 0.469  | 0.845  | 0.728  | 0.312  | 0.339  | 0.214  | 0.295  | -0.145 | -0.165 | 0.290  | 0.078  |
| P5     | Right | -0.521 | -0.670 | -0.842 | 0.742  | 0.724  | 0.553  | 0.526  | 0.105  | 0.353  | 0.239  | -0.272 | -0.230 | -0.291 | -0.116 |
| P6     | Left  | -0.052 | -0.196 | 0.119  | -0.203 | 0.000  | 0.002  | -0.027 | -0.035 | -0.066 | -0.052 | -0.030 | 0.066  | 0.038  | -0.019 |
| P6     | Right | -0.004 | 0.016  | -0.033 | -0.003 | -0.062 | -0.035 | 0.040  | 0.004  | -0.035 | 0.045  | -0.037 | -0.022 | -0.021 | 0.014  |
| P7     | Left  | 0.015  | -0.095 | 0.050  | 0.159  | -0.134 | 0.251  | -0.194 | 0.406  | 0.303  | -0.139 | 0.240  | 0.252  | 0.445  | 0.015  |
| P7     | Right | 0.222  | 0.274  | 0.058  | 0.198  | 0.128  | 0.329  | -0.487 | 0.554  | 0.585  | -0.455 | 0.111  | -0.018 | 0.238  | -0.038 |
| P8     | Left  | -0.076 | 0.076  | 0.085  | -0.074 | 0.061  | -0.019 | -0.079 | -0.049 | -0.008 | -0.202 | 0.048  | -0.052 | 0.086  | 0.162  |
| P8     | Right | -0.024 | -0.051 | -0.022 | 0.067  | -0.018 | -0.007 | 0.047  | -0.058 | 0.027  | 0.011  | 0.044  | -0.005 | -0.069 | 0.043  |

| n  | Hemi  | V1   | V2d  | V2v  | V3d  | V3v  | hV4  | VO-1 | VO-2 | PHC-1 | PHC-2 | LO-1 | LO-2 | TO-1 | TO-2 |
|----|-------|------|------|------|------|------|------|------|------|-------|-------|------|------|------|------|
| P1 | Left  | 3677 | 1617 | 1570 | 1398 | 1421 | 1202 | 1261 | 817  | 520   | 630   | 964  | 1053 | 986  | 785  |
| P1 | Right | 3415 | 1620 | 2163 | 1197 | 1480 | 1466 | 800  | 400  | 365   | 164   | 791  | 831  | 695  | 509  |
| P2 | Left  | 3810 | 1656 | 1767 | 1381 | 1395 | 1205 | 896  | 643  | 930   | 932   | 1190 | 1197 | 1293 | 995  |
| P2 | Right | 3153 | 1443 | 1802 | 1521 | 1245 | 955  | 775  | 382  | 497   | 639   | 747  | 948  | 921  | 960  |
| P3 | Left  | 3684 | 1457 | 1987 | 1208 | 1170 | 900  | 1397 | 1296 | 461   | 373   | 599  | 1199 | 1311 | 843  |
| P3 | Right | 3628 | 1606 | 1782 | 1383 | 1002 | 970  | 1264 | 876  | 742   | 1205  | 1229 | 1186 | 778  | 378  |
| P4 | Left  | 2201 | 1053 | 1492 | 964  | 1132 | 1111 | 518  | 397  | 843   | 950   | 827  | 923  | 947  | 248  |
| P4 | Right | 2346 | 1224 | 1357 | 928  | 1187 | 1064 | 524  | 640  | 671   | 421   | 1059 | 894  | 1217 | 692  |
| P5 | Left  | 3541 | 1231 | 1145 | 978  | 988  | 1256 | 564  | 450  | 766   | 293   | 681  | 681  | 626  | 850  |
| P5 | Right | 2485 | 1701 | 1440 | 1154 | 1206 | 878  | 1180 | 458  | 696   | 650   | 803  | 1236 | 334  | 222  |
| P6 | Left  | 3333 | 1495 | 1318 | 1548 | 1205 | 1147 | 1247 | 1670 | 952   | 570   | 1253 | 2097 | 657  | 623  |
| P6 | Right | 2783 | 1357 | 1547 | 1413 | 1533 | 1038 | 1093 | 1391 | 1347  | 1159  | 1402 | 1791 | 693  | 511  |
| P7 | Left  | 3213 | 1222 | 1494 | 1004 | 853  | 853  | 668  | 775  | 335   | 442   | 936  | 1230 | 677  | 274  |
| P7 | Right | 2725 | 1173 | 1333 | 972  | 1205 | 785  | 801  | 639  | 654   | 643   | 729  | 461  | 842  | 624  |
| P8 | Left  | 2289 | 1152 | 1491 | 1022 | 1130 | 1178 | 1299 | 1162 | 1484  | 519   | 781  | 1050 | 546  | 485  |
| P8 | Right | 2885 | 1346 | 1662 | 1148 | 1178 | 1061 | 834  | 1222 | 1022  | 1239  | 893  | 1117 | 619  | 722  |

**Table S15: Descriptive statistics for correlations between the preferred representational space position x0 and visual field position eccentricity in the Between ROI model.** Top: p-values of correlations in each map for each hemisphere, after correction for false discovery rate. Middle: Pearson's correlation coefficient (r) in each map. Bottom: Number of selected measurement in each map.

| P           | Hemi  | V1        | V2d       | V2v        | V3d        | V3v        | hV4        | VO-1       | VO-2       | PHC-1      | PHC-2      | LO-1       | LO-2       | TO-1       | TO-2       | p<0.05 | %         |
|-------------|-------|-----------|-----------|------------|------------|------------|------------|------------|------------|------------|------------|------------|------------|------------|------------|--------|-----------|
| P1          | Left  | 1.41E-111 | 1.172E-10 | 0.04333578 | 0.93967151 | 7.7957E-09 | 0.16391546 | 0.07489724 | 0.17132521 | 0.01944726 | 2.065E-07  | 4.4158E-11 | 0.82746027 | 1.9014E-26 | 0.67613084 | 8      | 57        |
| P1          | Right | 1.13E-96  | 6.086E-27 | 2.5988E-09 | 1.991E-41  | 1.4405E-14 | 0.00941512 | 0.13931168 | 0.85855738 | 2.8259E-06 | 3.7157E-06 | 4.4699E-08 | 4.0778E-11 | 0.45443718 | 2.6832E-06 | 11     | 79        |
| P2          | Left  | 5.309E-37 | 0.8234792 | 0.000281   | 0.00333925 | 1.0497E-05 | 8.4878E-09 | 0.00880118 | 0.03776613 | 4.9082E-08 | 0.9127048  | 0.16929321 | 0.67570039 | 0.07773849 | 1.9497E-08 | 9      | 64        |
| P2          | Right | 0.0273411 | 0.1375726 | 0.62760947 | 0.00210668 | 0.04846019 | 0.15050941 | 0.00059205 | 1.8344E-08 | 0.99705091 | 4.363E-09  | 1.5073E-26 | 3.0971E-45 | 0.11327911 | 2.1737E-14 | 9      | 64        |
| P3          | Left  | 1.136E-66 | 8.339E-18 | 2.0591E-39 | 4.6039E-08 | 9.242E-28  | 0.00486196 | 1.5095E-10 | 1.4396E-44 | 2.165E-21  | 7.069E-09  | 0.02783515 | 2.2244E-15 | 2.6669E-07 | 0.00695516 | 14     | 100       |
| P3          | Right | 4.685E-57 | 7.64E-17  | 1.4875E-21 | 1.0208E-17 | 2.1104E-24 | 0.52447427 | 3.9278E-39 | 3.7502E-27 | 0.01728692 | 8.0286E-06 | 5.0397E-09 | 0.00328318 | 0.07831752 | 0.82746027 | 11     | 79        |
| P4          | Left  | 0.7775931 | 7.619E-10 | 0.32303824 | 0.00052888 | 0.18411271 | 0.61749401 | 0.12688613 | 0.91547825 | 1.9131E-05 | 0.52447427 | 0.00125019 | 0.5006498  | 2.2838E-11 | 0.06742707 | 5      | 36        |
| P4          | Right | 8.887E-65 | 0.0002727 | 0.00292713 | 0.00557683 | 0.90275578 | 0.00372469 | 0.00973974 | 0.62760947 | 0.37212789 | 0.00054983 | 5.4884E-07 | 0.07085403 | 2.5968E-07 | 0.00210135 | 10     | 71        |
| P5          | Left  | 4.08E-36  | 0.0039404 | 1.7939E-16 | 0.32138369 | 4.627E-30  | 3.8474E-13 | 0.95912676 | 0.00567756 | 0.77183262 | 0.00176799 | 0.77183262 | 0.09025479 | 5.0807E-06 | 0.11517379 | 8      | 57        |
| P5          | Right | 0.9795762 | 0.0378134 | 2.3283E-09 | 3.4541E-07 | 0.00144949 | 0.20289431 | 6.6972E-05 | 0.92737523 | 0.19170647 | 0.00686782 | 1.4236E-06 | 0.22527456 | 0.1494799  | 0.952162   | 7      | 50        |
| P6          | Left  | 0.0001239 | 0.0077248 | 0.22032758 | 0.36110389 | 0.31020049 | 0.35503088 | 0.99705091 | 0.97957619 | 0.4826081  | 0.44322028 | 0.85970844 | 0.98805336 | 0.0033727  | 0.88698573 | 3      | 21        |
| P6          | Right | 0.9027558 | 0.5759948 | 0.95912676 | 0.10927998 | 0.70711414 | 0.54635194 | 0.12635666 | 0.37212789 | 0.92102461 | 0.20248927 | 0.92160023 | 0.41443394 | 0.4689124  | 0.41443394 | 0      | 0         |
| P7          | Left  | 5.64E-77  | 8.316E-23 | 0.10290368 | 1.4158E-38 | 6.7807E-17 | 2.5609E-16 | 0.01309527 | 0.34641337 | 0.0002473  | 0.00292713 | 0.00205057 | 0.47508448 | 0.12682264 | 0.45443718 | 9      | 64        |
| P7          | Right | 2.86E-106 | 6.601E-10 | 1.9553E-07 | 1.8087E-25 | 1.1759E-64 | 1.9503E-16 | 3.2065E-07 | 0.97957619 | 0.00383267 | 0.45443718 | 0.00785975 | 6.2938E-05 | 0.00145066 | 0.91751512 | 11     | 79        |
| P8          | Left  | 0.9795762 | 0.7071141 | 0.77183262 | 0.34641337 | 0.55597965 | 0.25619837 | 0.09684429 | 0.95688785 | 0.9127048  | 0.02952327 | 0.67032992 | 0.1152171  | 0.03611719 | 0.32188606 | 2      | 14        |
| P8          | Right | 0.2366021 | 0.4689124 | 0.72361275 | 0.03538571 | 0.68460483 | 0.97957619 | 2.8579E-05 | 0.45443718 | 0.32532422 | 0.00843774 | 0.44322028 | 0.57408566 | 0.28691345 | 0.11174418 | 3      | 21        |
| p < 0.05    |       | 11        | 11        | 9          | 11         | 10         | 7          | 9          | 5          | 8          | 11         | 10         | 5          | 8          | 5          | 120    | Sum Total |
| Percent age |       | 69        | 69        | 56         | 69         | 63         | 44         | 56         | 31         | 50         | 69         | 63         | 31         | 50         | 31         | 54     | % Total   |

| $\rho$ | Hemi | V1 | V2d | V2v | V3d | V3v | hV4 | VO-1 | VO-2 | PHC-1 | PHC-2 | LO-1 | LO-2 | TO-1 | TO-2 |
|--------|------|----|-----|-----|-----|-----|-----|------|------|-------|-------|------|------|------|------|
|--------|------|----|-----|-----|-----|-----|-----|------|------|-------|-------|------|------|------|------|

|    |       |        |        |        |        |        |        |        |        |        |        |        |        |        |        |
|----|-------|--------|--------|--------|--------|--------|--------|--------|--------|--------|--------|--------|--------|--------|--------|
| P1 | Left  | -0.647 | -0.731 | -0.760 | -0.604 | -0.622 | -0.551 | 0.438  | 0.445  | 0.306  | -0.494 | -0.648 | -0.159 | 0.138  | -0.346 |
| P1 | Right | 0.362  | 0.165  | 0.057  | -0.004 | 0.159  | 0.047  | 0.058  | 0.056  | -0.113 | 0.214  | 0.218  | -0.010 | 0.336  | -0.020 |
| P2 | Left  | 0.349  | 0.268  | -0.133 | 0.381  | 0.204  | -0.074 | 0.061  | 0.015  | -0.254 | 0.369  | 0.201  | 0.235  | 0.036  | 0.217  |
| P2 | Right | -0.207 | -0.009 | 0.092  | 0.086  | 0.124  | 0.172  | 0.096  | 0.092  | -0.185 | 0.007  | -0.047 | -0.017 | -0.056 | 0.184  |
| P3 | Left  | -0.044 | -0.045 | 0.015  | -0.086 | 0.063  | 0.054  | -0.132 | -0.295 | 0.000  | 0.239  | -0.383 | -0.442 | 0.061  | -0.250 |
| P3 | Right | 0.282  | 0.228  | 0.293  | 0.163  | 0.318  | 0.102  | 0.177  | 0.381  | -0.431 | -0.306 | -0.100 | -0.233 | -0.148 | 0.102  |
| P4 | Left  | 0.263  | 0.212  | 0.228  | 0.234  | 0.321  | 0.026  | 0.362  | 0.360  | -0.097 | -0.135 | -0.173 | -0.093 | 0.072  | 0.018  |
| P4 | Right | 0.009  | -0.196 | -0.031 | -0.120 | 0.046  | -0.020 | -0.078 | 0.010  | 0.155  | -0.026 | 0.121  | -0.028 | -0.223 | 0.133  |
| P5 | Left  | 0.344  | -0.111 | -0.088 | -0.099 | -0.007 | -0.097 | -0.123 | 0.026  | 0.043  | -0.180 | 0.160  | -0.069 | -0.154 | 0.127  |
| P5 | Right | -0.212 | 0.089  | -0.247 | -0.039 | 0.358  | -0.209 | -0.004 | -0.142 | -0.015 | -0.197 | 0.016  | -0.075 | 0.191  | -0.063 |
| P6 | Left  | -0.001 | 0.056  | -0.163 | 0.156  | 0.099  | 0.051  | 0.123  | 0.007  | -0.058 | 0.116  | -0.178 | 0.041  | 0.092  | -0.008 |
| P6 | Right | -0.071 | -0.075 | -0.040 | 0.029  | -0.036 | -0.034 | 0.000  | 0.001  | -0.029 | 0.041  | 0.008  | -0.001 | 0.124  | 0.010  |
| P7 | Left  | -0.004 | -0.020 | -0.002 | 0.049  | -0.013 | -0.024 | -0.054 | -0.030 | 0.005  | 0.044  | 0.005  | -0.024 | -0.035 | -0.045 |
| P7 | Right | -0.323 | -0.282 | -0.049 | -0.400 | -0.288 | 0.283  | 0.105  | 0.042  | -0.213 | -0.154 | -0.109 | 0.026  | -0.068 | -0.058 |
| P8 | Left  | -0.405 | -0.186 | -0.149 | -0.332 | -0.467 | 0.295  | 0.188  | -0.002 | -0.123 | -0.037 | -0.108 | 0.197  | 0.119  | -0.007 |
| P8 | Right | 0.001  | 0.015  | -0.011 | 0.036  | -0.023 | -0.040 | 0.053  | 0.003  | -0.005 | -0.107 | -0.021 | 0.056  | 0.101  | 0.055  |

| n  | Hemi  | V1   | V2d  | V2v  | V3d  | V3v  | hV4  | VO-1 | VO-2 | PHC-1 | PHC-2 | LO-1 | LO-2 | TO-1 | TO-2 |
|----|-------|------|------|------|------|------|------|------|------|-------|-------|------|------|------|------|
| P1 | Left  | 3677 | 1617 | 1570 | 1398 | 1421 | 1202 | 1261 | 817  | 520   | 630   | 964  | 1053 | 986  | 785  |
| P1 | Right | 3415 | 1620 | 2163 | 1197 | 1480 | 1466 | 800  | 400  | 365   | 164   | 791  | 831  | 695  | 509  |
| P2 | Left  | 3810 | 1656 | 1767 | 1381 | 1395 | 1205 | 896  | 643  | 930   | 932   | 1190 | 1197 | 1293 | 995  |
| P2 | Right | 3153 | 1443 | 1802 | 1521 | 1245 | 955  | 775  | 382  | 497   | 639   | 747  | 948  | 921  | 960  |
| P3 | Left  | 3684 | 1457 | 1987 | 1208 | 1170 | 900  | 1397 | 1296 | 461   | 373   | 599  | 1199 | 1311 | 843  |
| P3 | Right | 3628 | 1606 | 1782 | 1383 | 1002 | 970  | 1264 | 876  | 742   | 1205  | 1229 | 1186 | 778  | 378  |
| P4 | Left  | 2201 | 1053 | 1492 | 964  | 1132 | 1111 | 518  | 397  | 843   | 950   | 827  | 923  | 947  | 248  |
| P4 | Right | 2346 | 1224 | 1357 | 928  | 1187 | 1064 | 524  | 640  | 671   | 421   | 1059 | 894  | 1217 | 692  |
| P5 | Left  | 3541 | 1231 | 1145 | 978  | 988  | 1256 | 564  | 450  | 766   | 293   | 681  | 681  | 626  | 850  |
| P5 | Right | 2485 | 1701 | 1440 | 1154 | 1206 | 878  | 1180 | 458  | 696   | 650   | 803  | 1236 | 334  | 222  |
| P6 | Left  | 3333 | 1495 | 1318 | 1548 | 1205 | 1147 | 1247 | 1670 | 952   | 570   | 1253 | 2097 | 657  | 623  |
| P6 | Right | 2783 | 1357 | 1547 | 1413 | 1533 | 1038 | 1093 | 1391 | 1347  | 1159  | 1402 | 1791 | 693  | 511  |
| P7 | Left  | 3213 | 1222 | 1494 | 1004 | 853  | 853  | 668  | 775  | 335   | 442   | 936  | 1230 | 677  | 274  |
| P7 | Right | 2725 | 1173 | 1333 | 972  | 1205 | 785  | 801  | 639  | 654   | 643   | 729  | 461  | 842  | 624  |
| P8 | Left  | 2289 | 1152 | 1491 | 1022 | 1130 | 1178 | 1299 | 1162 | 1484  | 519   | 781  | 1050 | 546  | 485  |
| P8 | Right | 2885 | 1346 | 1662 | 1148 | 1178 | 1061 | 834  | 1222 | 1022  | 1239  | 893  | 1117 | 619  | 722  |

**Table S16: Descriptive statistics for correlations between the preferred representational space position  $y_0$  and visual field position eccentricity in the Between ROI model.** Top: p-values of correlations in each map for each hemisphere, after correction for false discovery rate. Middle: Pearson's correlation coefficient ( $r$ ) in each map. Bottom: Number of selected measurement in each map.
